# Supplementary material
Source: PubMed Central journal article supplement (PMC7457965)

## Supporting Information

### **Synthesis and biological evaluation of novel flexible nucleoside analogues that inhibit flavivirus replication *in vitro***

Joy E. Thames<sup>a</sup>, Charles D. Waters III<sup>a</sup>, Coralie Valle<sup>b</sup>, Marcella Bassetto<sup>c</sup>, Wahiba Aouadi<sup>b</sup>  
Baptiste Martin<sup>b</sup>, Barbara Selisko<sup>b</sup>, Arissa Falat<sup>a</sup>, Bruno Coutard<sup>d</sup>, Andrea Brancale<sup>e</sup>, Bruno  
Canard<sup>b</sup>, Etienne Decroly<sup>b</sup>, and Katherine L. Seley-Radtke<sup>a</sup> \*

<sup>a</sup>Department of Chemistry and Biochemistry, University of Maryland, Baltimore County, Baltimore, MD, USA; <sup>b</sup>AFMB-UMR7257, CNRS, Aix Marseille University, Marseille, France; <sup>c</sup>Department of Chemistry, College of Science, Swansea University, Swansea, United Kingdom; <sup>d</sup>Unité des Virus Émergents (UVE: Aix-Marseille Univ - IRD 190 - Inserm 1207 - IHU Méditerranée Infection), Marseille, France; <sup>e</sup>School of Pharmacy and Pharmaceutical Sciences, Cardiff University, Cardiff, UK;

\* Corresponding author. Tel.: 410-455--8684; e-mail: [kseley@umbc.edu](mailto:kseley@umbc.edu)

Supplemental data:

<sup>1</sup>H NMR of compound **1**

<sup>13</sup>C NMR of compound **1**

<sup>1</sup>H NMR of compound **2**

<sup>13</sup>C NMR of compound **2**

<sup>1</sup>H NMR of compound **1-Ac**

<sup>13</sup>C NMR of compound **1-Ac**

<sup>1</sup>H NMR of compound **2-Ac**

<sup>13</sup>C NMR of compound **2-Ac**

<sup>1</sup>H NMR of compound **1-MG**

<sup>13</sup>C NMR of compound **1-MG**

<sup>31</sup>P NMR of compound **1-MG**

<sup>1</sup>H NMR of compound **2-MG**

<sup>13</sup>C NMR of compound **2-MG**

<sup>1</sup>H NMR of compound **1-TP**

<sup>31</sup>P NMR of compound **1-TP**

<sup>1</sup>H NMR of compound **2-TP**

<sup>13</sup>C NMR of compound **1-TP**

<sup>31</sup>P NMR of compound **2-TP**

ESI+ Mass spec of compound **11**

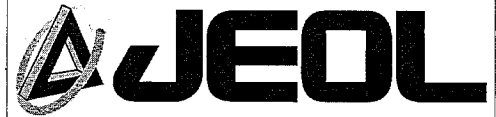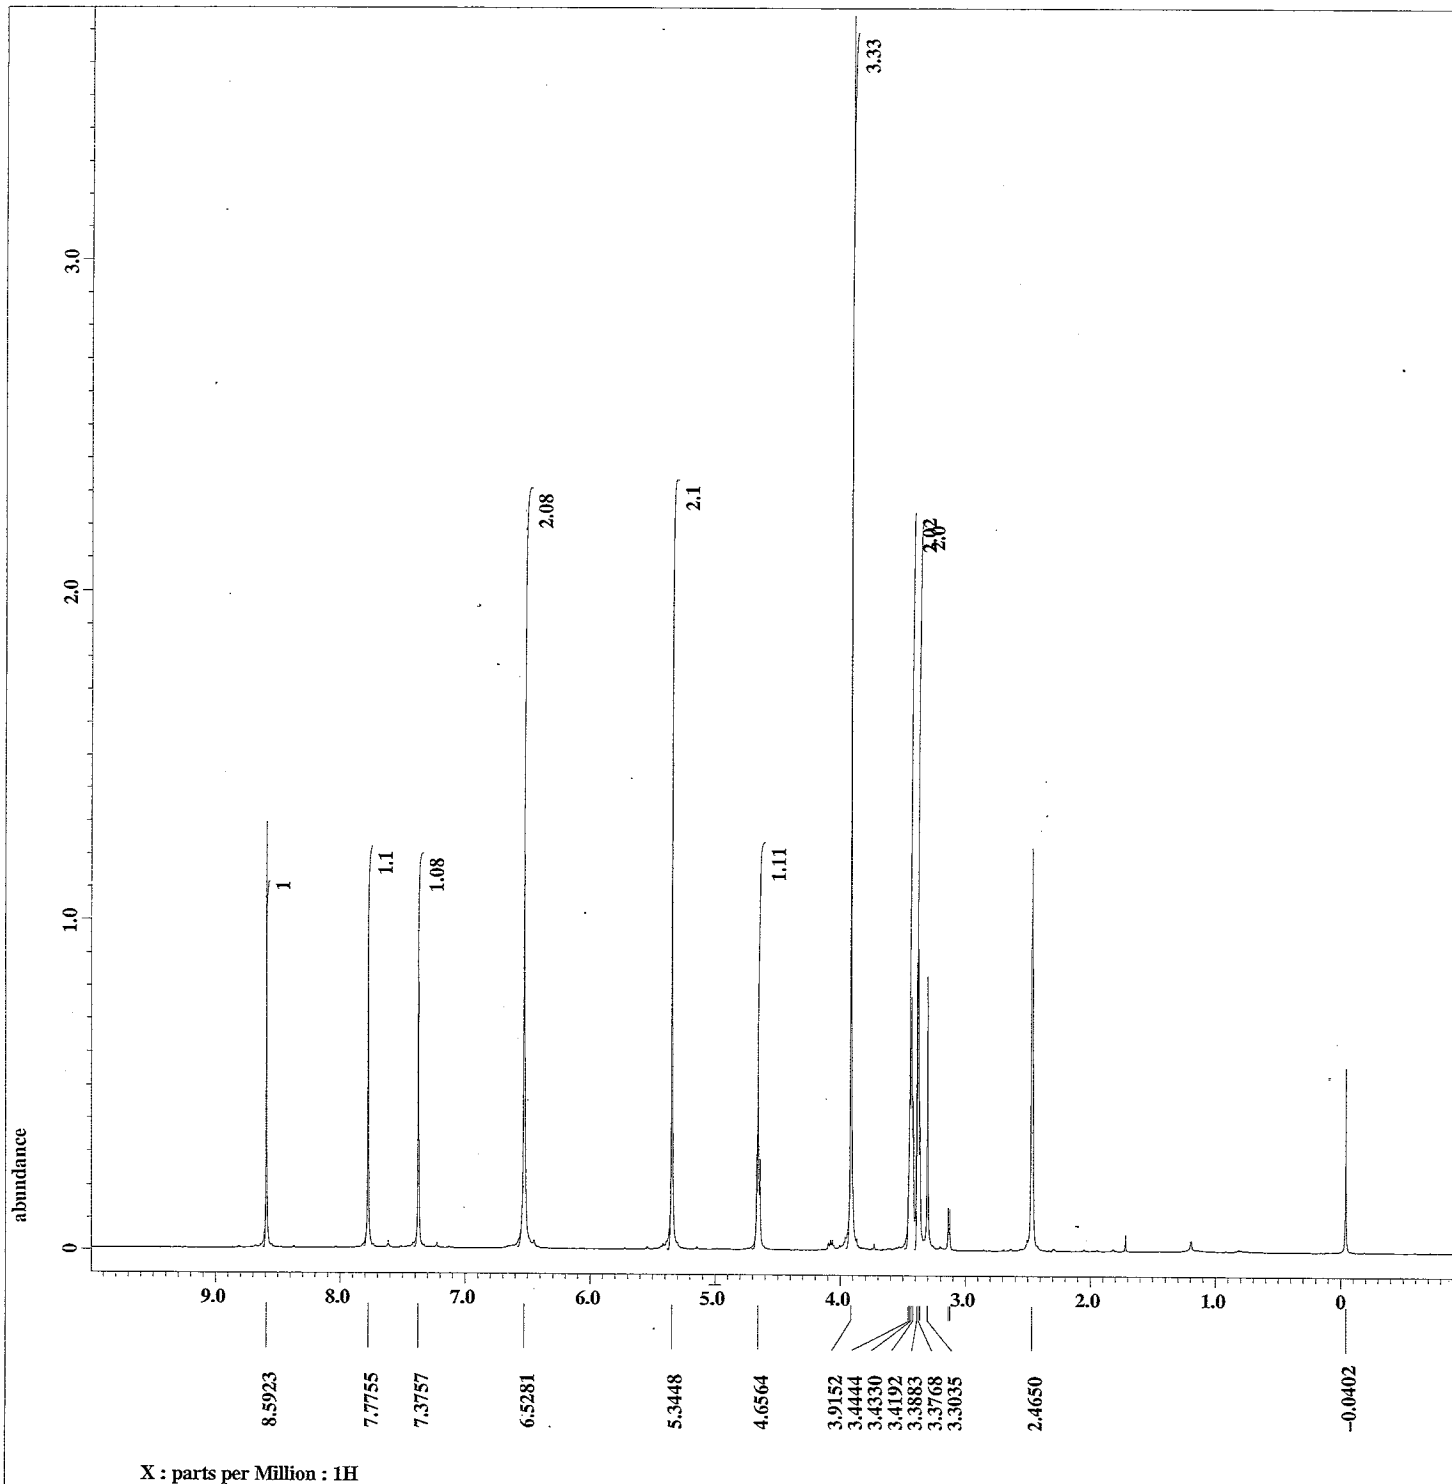

Filename = HP083-4.jdf  
Author = Seley  
Experiment = single\_pulse.ex2  
Sample\_id = S#405935  
Solvent = DMSO-D6  
Creation\_time = 19-JUN-2020 11:08:22  
Revision\_time = 19-JUN-2020 11:25:22  
Current\_time = 19-JUN-2020 11:25:33

Comment = single\_pulse  
Data\_format = 1D\_COMPLEX  
Dim\_size = 13107  
Dim\_title = 1H  
Dim\_units = [ppm]  
Dimensions = X  
Site = ECX 400  
Spectrometer = DELTA2\_NMR

Field\_strength = 9.389766[T] (400[MHz])  
X\_acq\_duration = 2.18365952[s]  
X\_domain = 1H  
X\_freq = 399.78219838[MHz]  
X\_offset = 5[ppm]  
X\_points = 16384  
X\_prescans = 1  
X\_resolution = 0.45794685[Hz]  
X\_sweep = 7.5030012[kHz]  
Irr\_domain = 1H  
Irr\_freq = 399.78219838[MHz]  
Irr\_offset = 5[ppm]  
Tri\_domain = 1H  
Tri\_freq = 399.78219838[MHz]  
Tri\_offset = 5[ppm]  
Clipped = FALSE  
Mod\_return = 1  
Scans = 16  
Total\_scans = 16

X\_90\_width = 13.5[us]  
X\_acq\_time = 2.18365952[s]  
X\_angle = 45[deg]  
X\_atn = 3[dB]  
X\_pulse = 6.75[us]  
Irr\_mode = Off  
Tri\_mode = Off  
Dante\_presat = FALSE  
Initial\_wait = 1[s]  
Recvr\_gain = 42  
Relaxation\_delay = 5[s]  
Repetition\_time = 7.18365952[s]  
Temp\_get = 22.4[dC]

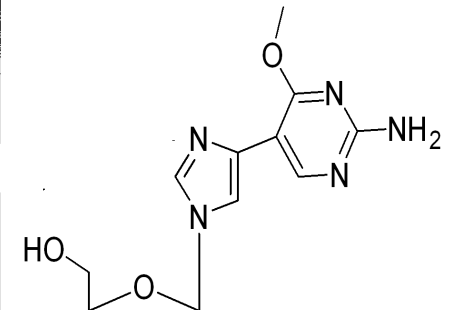

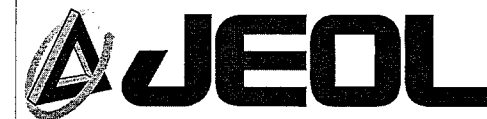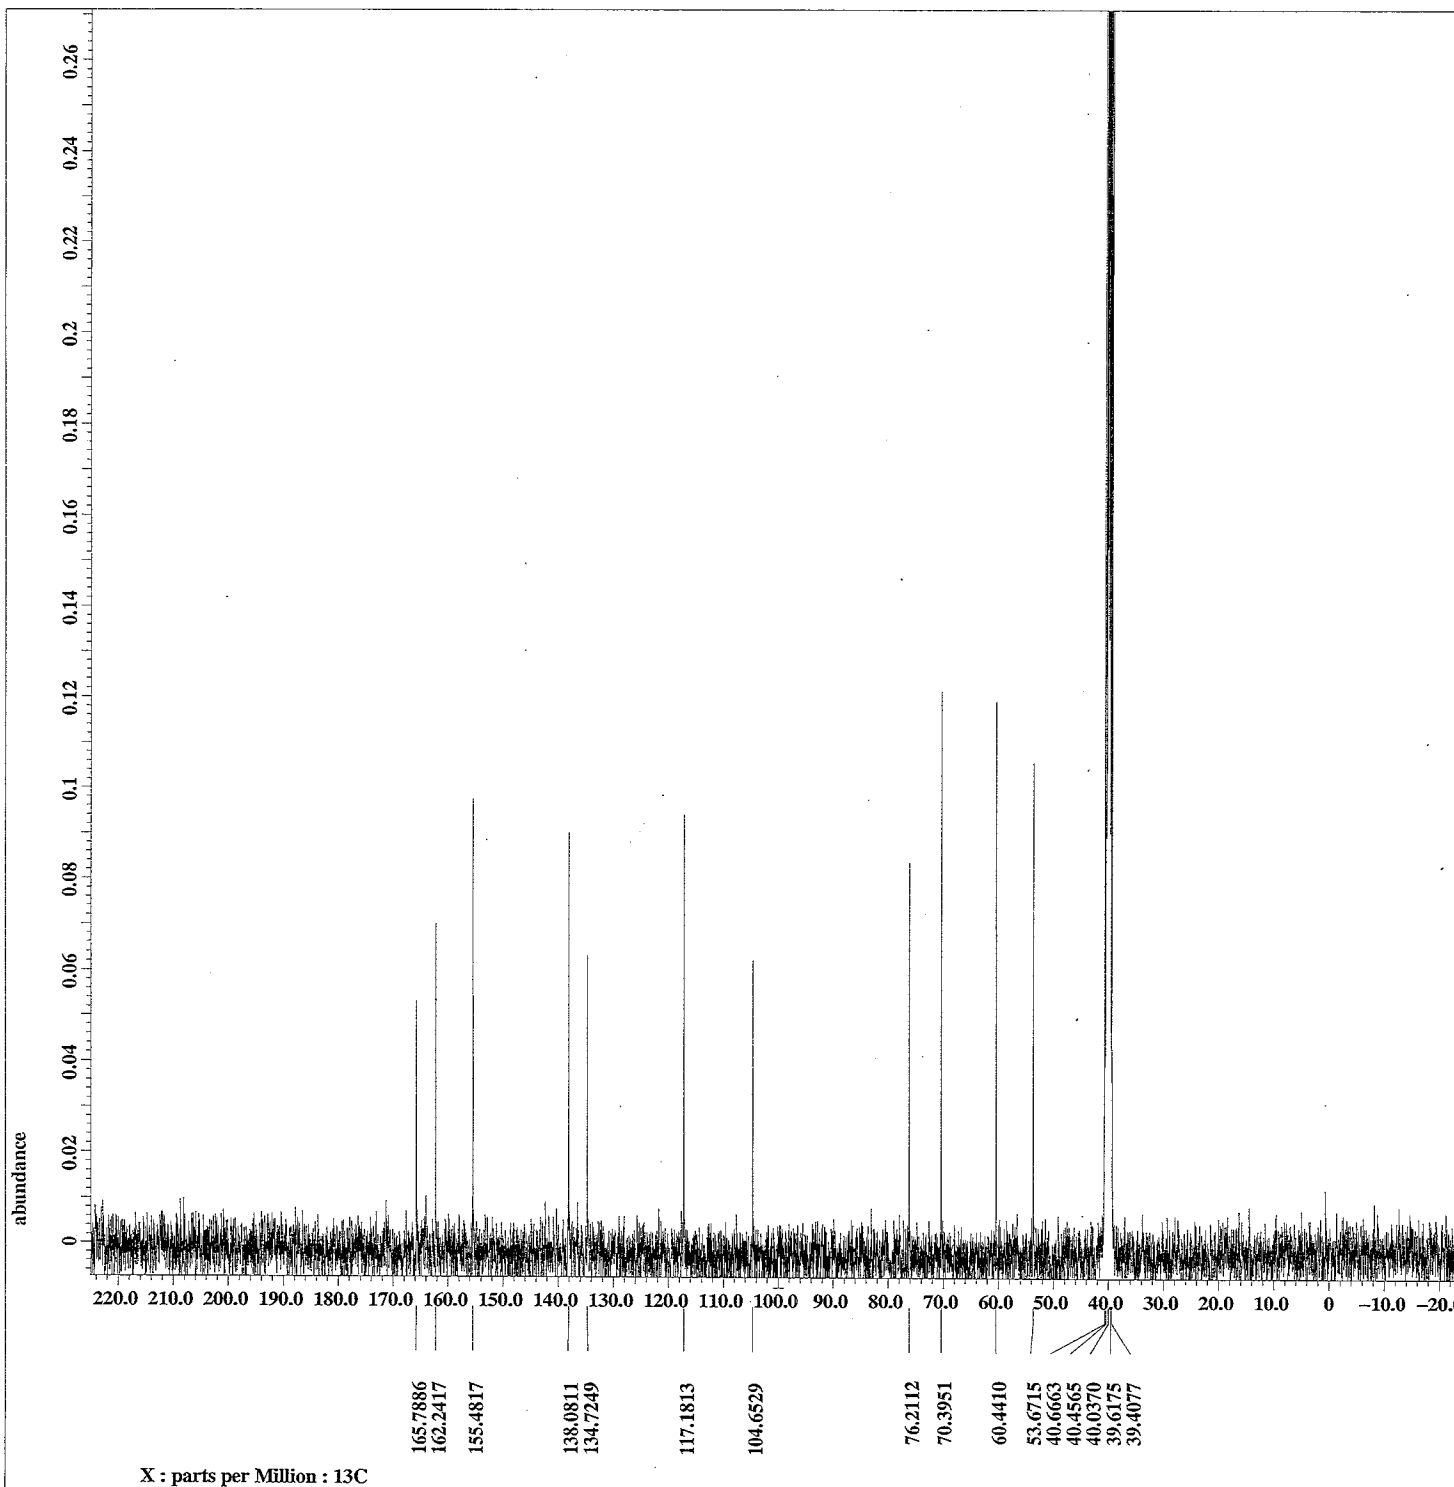

X : parts per Million : 13C

```
Filename      = HP083-5.jdf
Author       = Seley
Experiment   = single_pulse_dec
Sample_id    = S#409376
Solvent      = DMSO-D6
Creation_time = 19-JUN-2020 11:35:12
Revision_time = 19-JUN-2020 11:49:07
Current_time  = 19-JUN-2020 11:49:30

Comment      = single pulse decouple
Data_format  = 1D_COMPLEX
Dim_size     = 26214
Dim_title    = 13C
Dim_units    = [ppm]
Dimensions   = X
Site         = ECX 400
Spectrometer = DELTA2_NMR

Field_strength = 9.389766[T] (400[MHz])
X_acq_duration = 1.04333312[s]
X_domain       = 13C
X_freq         = 100.52530333[MHz]
X_offset       = 100[ppm]
X_points       = 32768
X_prescans     = 4
X_resolution   = 0.95846665[Hz]
X_sweep        = 31.40703518[kHz]
Irr_domain     = 1H
Irr_freq       = 399.78219838[MHz]
Irr_offset     = 5[ppm]
Clipped        = TRUE
Mod_return     = 1
Scans          = 462
Total_scans    = 462

X_90_width    = 7[us]
X_acq_time     = 1.04333312[s]
X_angle        = 30[deg]
X_atn          = 6[dB]
X_pulse        = 2.33333333[us]
Irr_atn_dec    = 21.1[dB]
Irr_atn_noe    = 21.1[dB]
Irr_noise      = WALTZ
Decoupling     = TRUE
Initial_wait   = 1[s]
Noe            = TRUE
Noe_time       = 2[s]
Recvr_gain     = 60
Relaxation_delay = 2[s]
Repetition_time = 3.04333312[s]
Temp_get       = 22.6[dC]
```

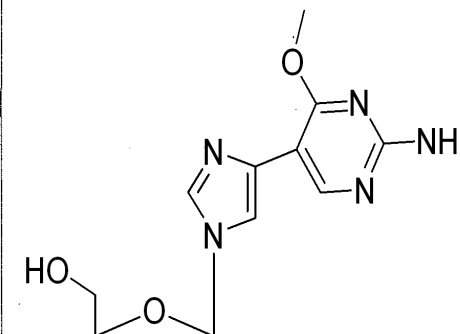

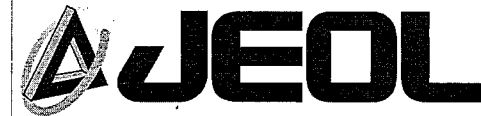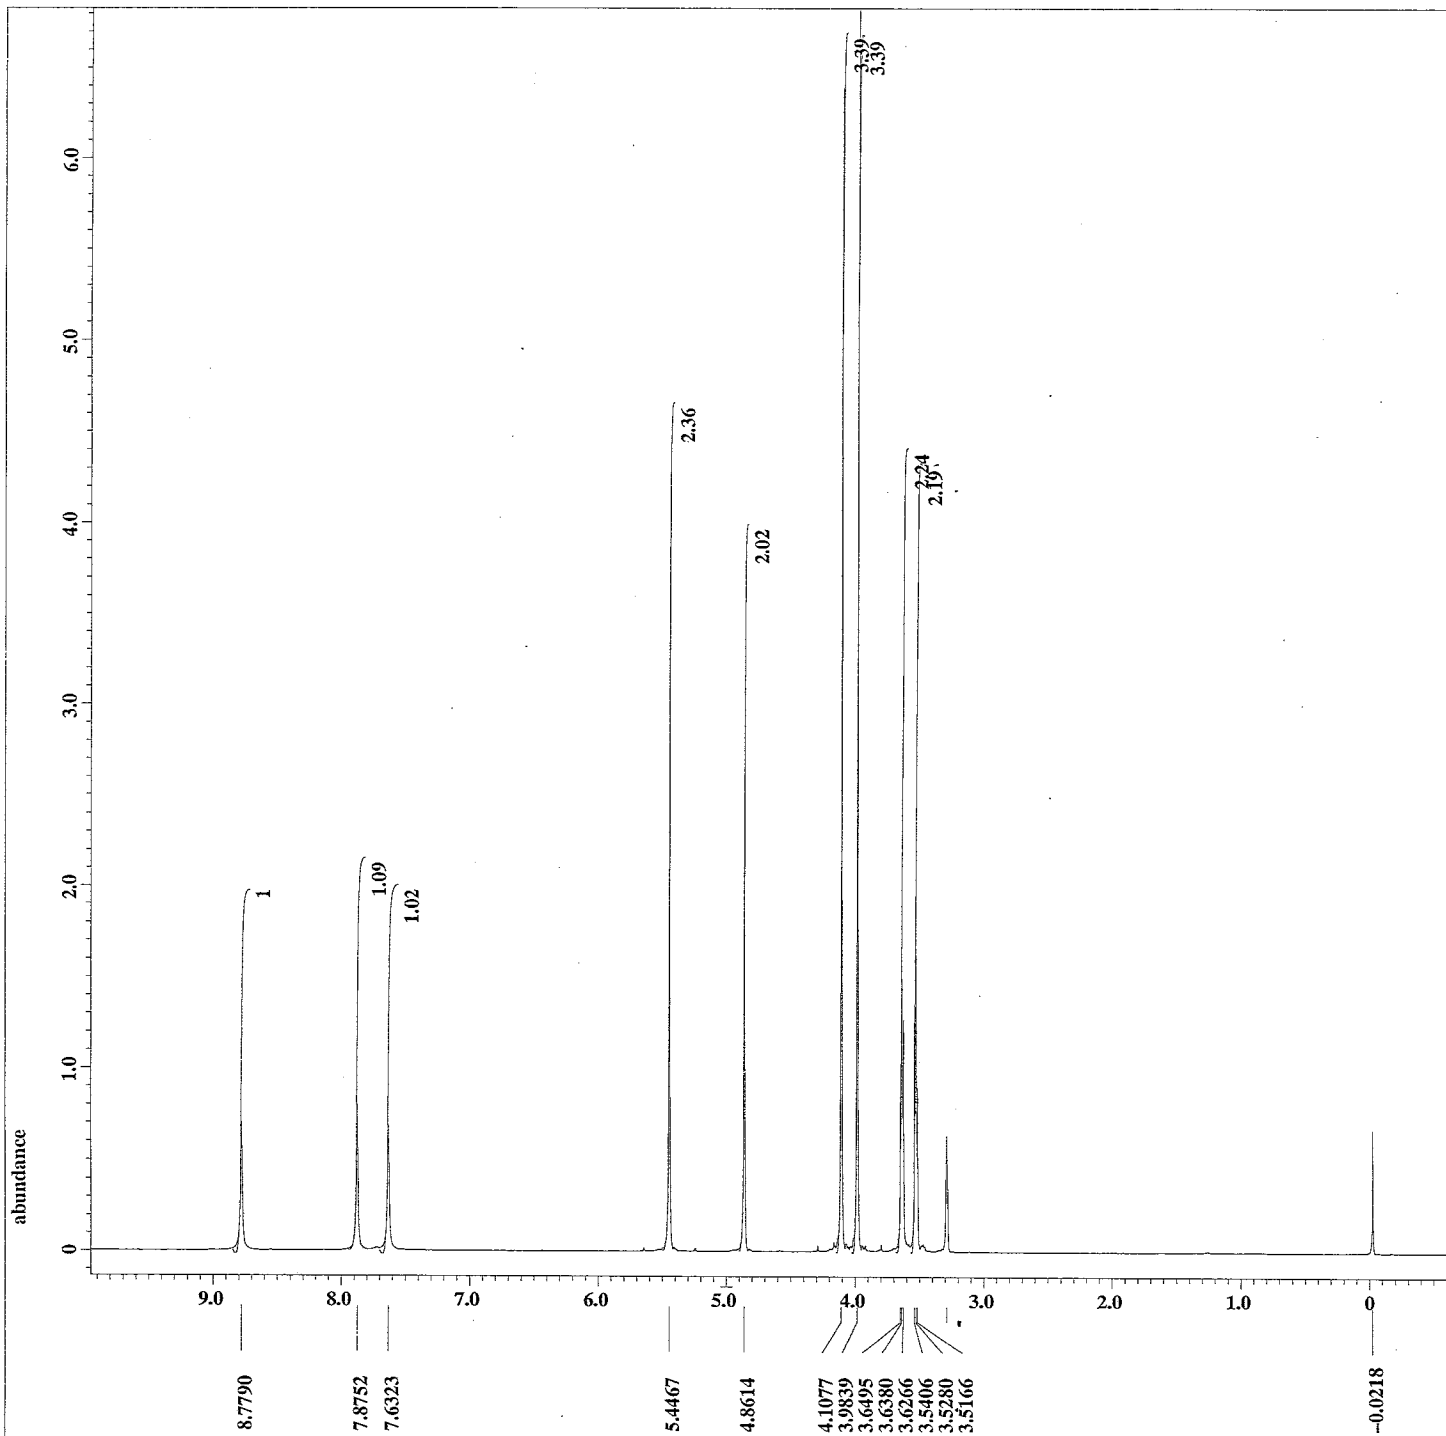

X : parts per Million : 1H

Filename = HP100-3.jdf  
Author = Seley  
Experiment = single\_pulse.ex2  
Sample\_id = S#359034  
Solvent = METHANOL-D3  
Creation\_time = 19-JUN-2020 09:49:45  
Revision\_time = 19-JUN-2020 10:10:01  
Current\_time = 19-JUN-2020 10:10:11

Comment = single\_pulse  
Data\_format = 1D COMPLEX  
Dim\_size = 13107  
Dim\_title = 1H  
Dim\_units = [ppm]  
Dimensions = X  
Site = ECX 400  
Spectrometer = DELTA2\_NMR

Field\_strength = 9.389766 [T] (400 [MHz])  
X\_acq\_duration = 2.18365952 [s]  
X\_domain = 1H  
X\_freq = 399.78219838 [MHz]  
X\_offset = 5 [ppm]  
X\_points = 16384  
X\_prescans = 1  
X\_resolution = 0.45794685 [Hz]  
X\_sweep = 7.5030012 [kHz]  
Irr\_domain = 1H  
Irr\_freq = 399.78219838 [MHz]  
Irr\_offset = 5 [ppm]  
Tri\_domain = 1H  
Tri\_freq = 399.78219838 [MHz]  
Tri\_offset = 5 [ppm]  
Clipped = FALSE  
Mod\_return = 1  
Scans = 16  
Total\_scans = 16

X\_90\_width = 13.5 [us]  
X\_acq\_time = 2.18365952 [s]  
X\_angle = 45 [deg]  
X\_atn = 3 [dB]  
X\_pulse = 6.75 [us]  
Irr\_mode = Off  
Tri\_mode = Off  
Dante\_presat = FALSE  
Initial\_wait = 1 [s]  
Recvr\_gain = 38  
Relaxation\_delay = 5 [s]  
Repetition\_time = 7.18365952 [s]  
Temp\_get = 22.5 [dC]

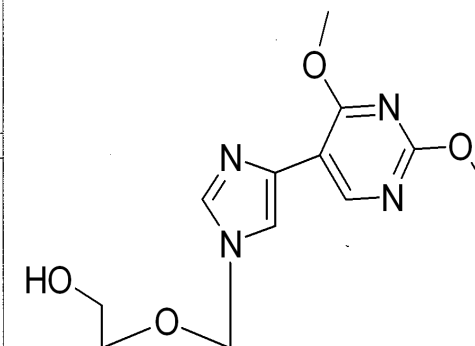

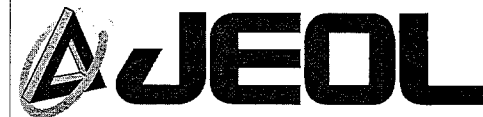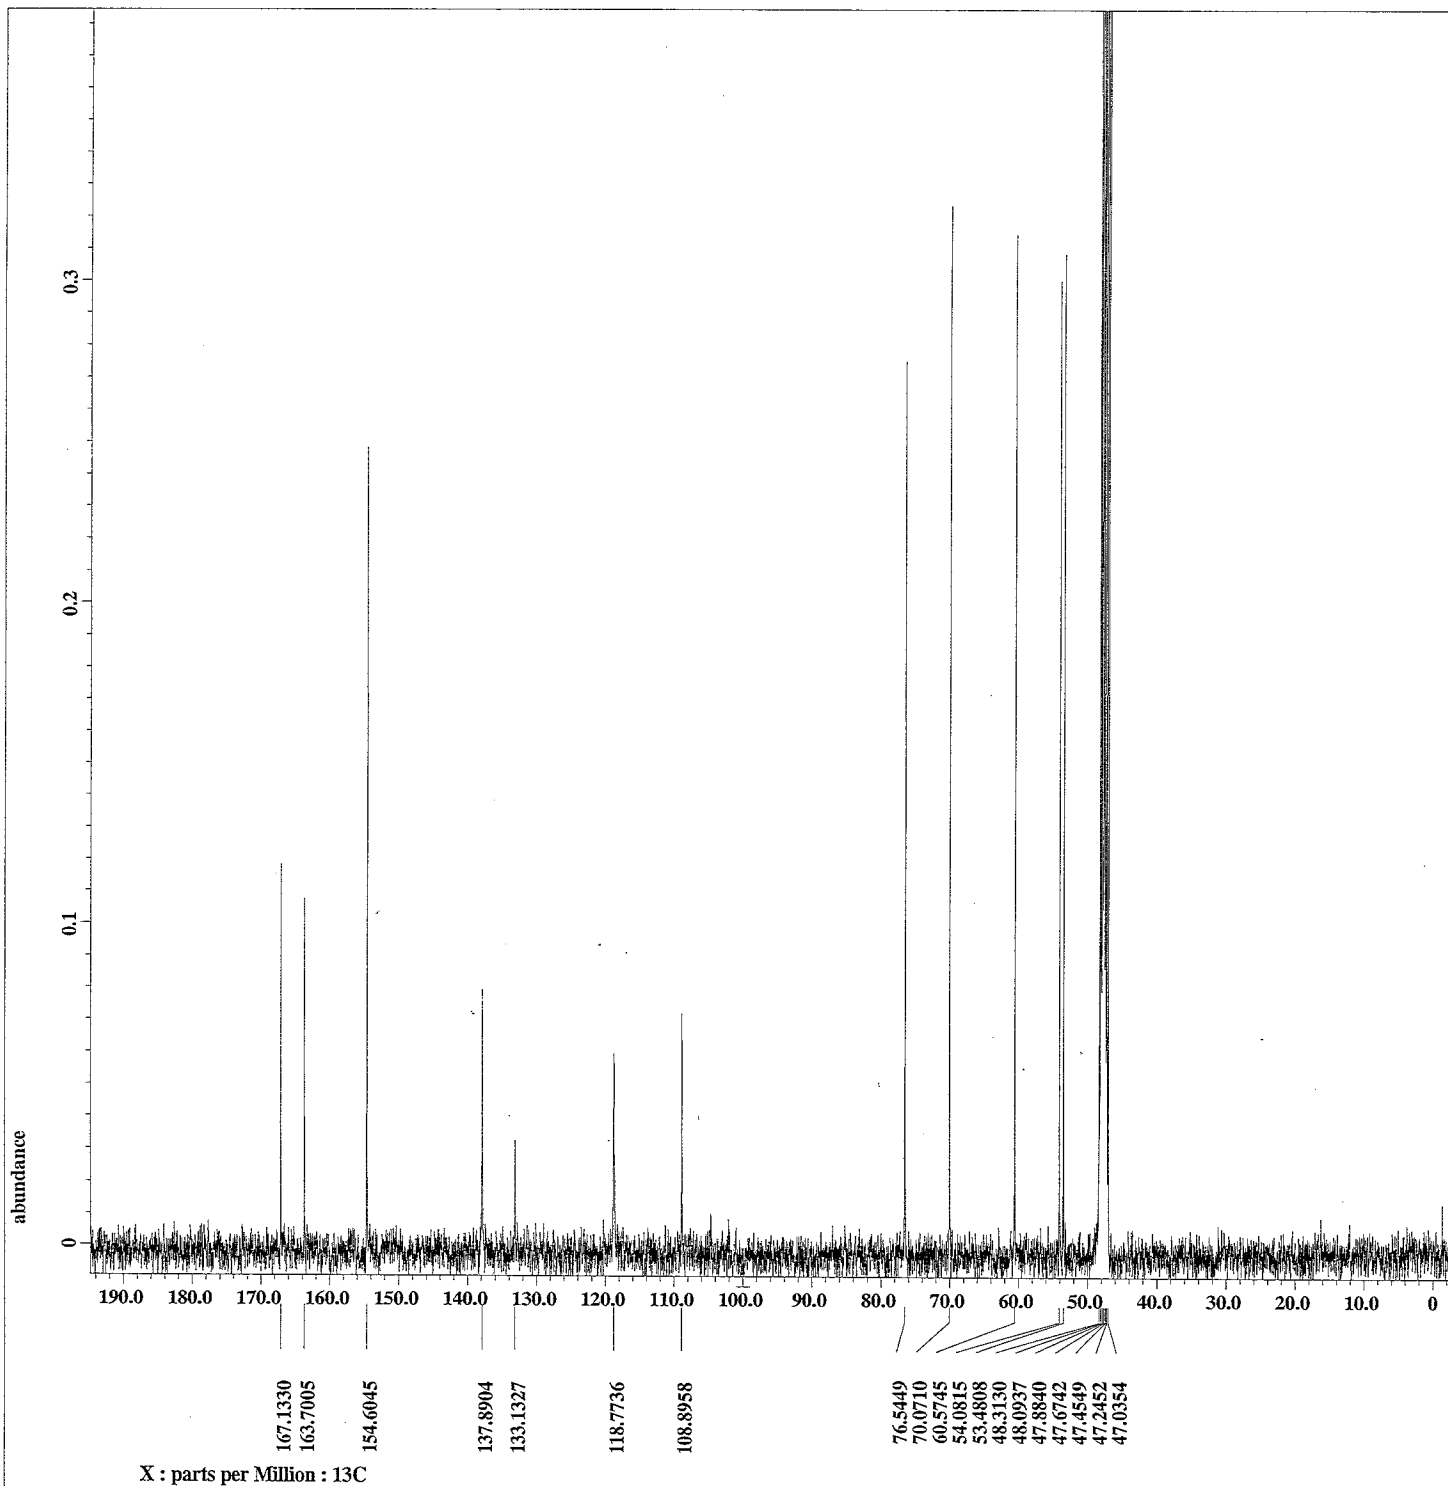

X : parts per Million : 13C

Filename = HP100-4.jdf  
Author = Seley  
Experiment = single\_pulse\_dec  
Sample\_id = S#361903  
Solvent = METHANOL-D3  
Creation\_time = 19-JUN-2020 10:16:06  
Revision\_time = 19-JUN-2020 10:33:18  
Current\_time = 19-JUN-2020 10:33:37

Comment = single pulse decouple  
Data\_format = 1D COMPLEX  
Dim\_size = 26214  
Dim\_title = 13C  
Dim\_units = [ppm]  
Dimensions = X  
Site = ECX 400  
Spectrometer = DELTA2\_NMR

Field\_strength = 9.389766[T] (400[MHz])  
X\_acq\_duration = 1.04333312[s]  
X\_domain = 13C  
X\_freq = 100.52530333[MHz]  
X\_offset = 100[ppm]  
X\_points = 32768  
X\_prescans = 4  
X\_resolution = 0.95846665[Hz]  
X\_sweep = 31.40703518[kHz]  
Irr\_domain = 1H  
Irr\_freq = 399.78219838[MHz]  
Irr\_offset = 5[ppm]  
Clipped = TRUE  
Mod\_return = 1  
Scans = 462  
Total\_scans = 462

X\_90\_width = 7[us]  
X\_acq\_time = 1.04333312[s]  
X\_angle = 30[deg]  
X\_atn = 6[db]  
X\_pulse = 2.33333333[us]  
Irr\_atn\_dec = 21.1[db]  
Irr\_atn\_noe = 21.1[db]  
Irr\_noise = WALTZ  
Decoupling = TRUE  
Initial\_wait = 1[s]  
Noe = TRUE  
Noe\_time = 2[s]  
Recvr\_gain = 60  
Relaxation\_delay = 2[s]  
Repetition\_time = 3.04333312[s]  
Temp\_get = 22.7[dc]

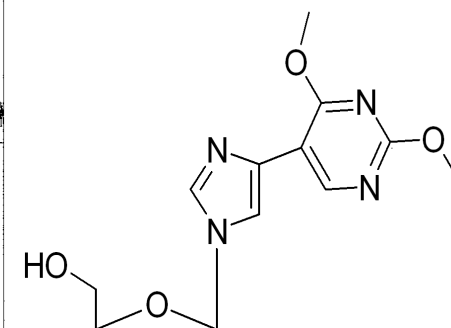

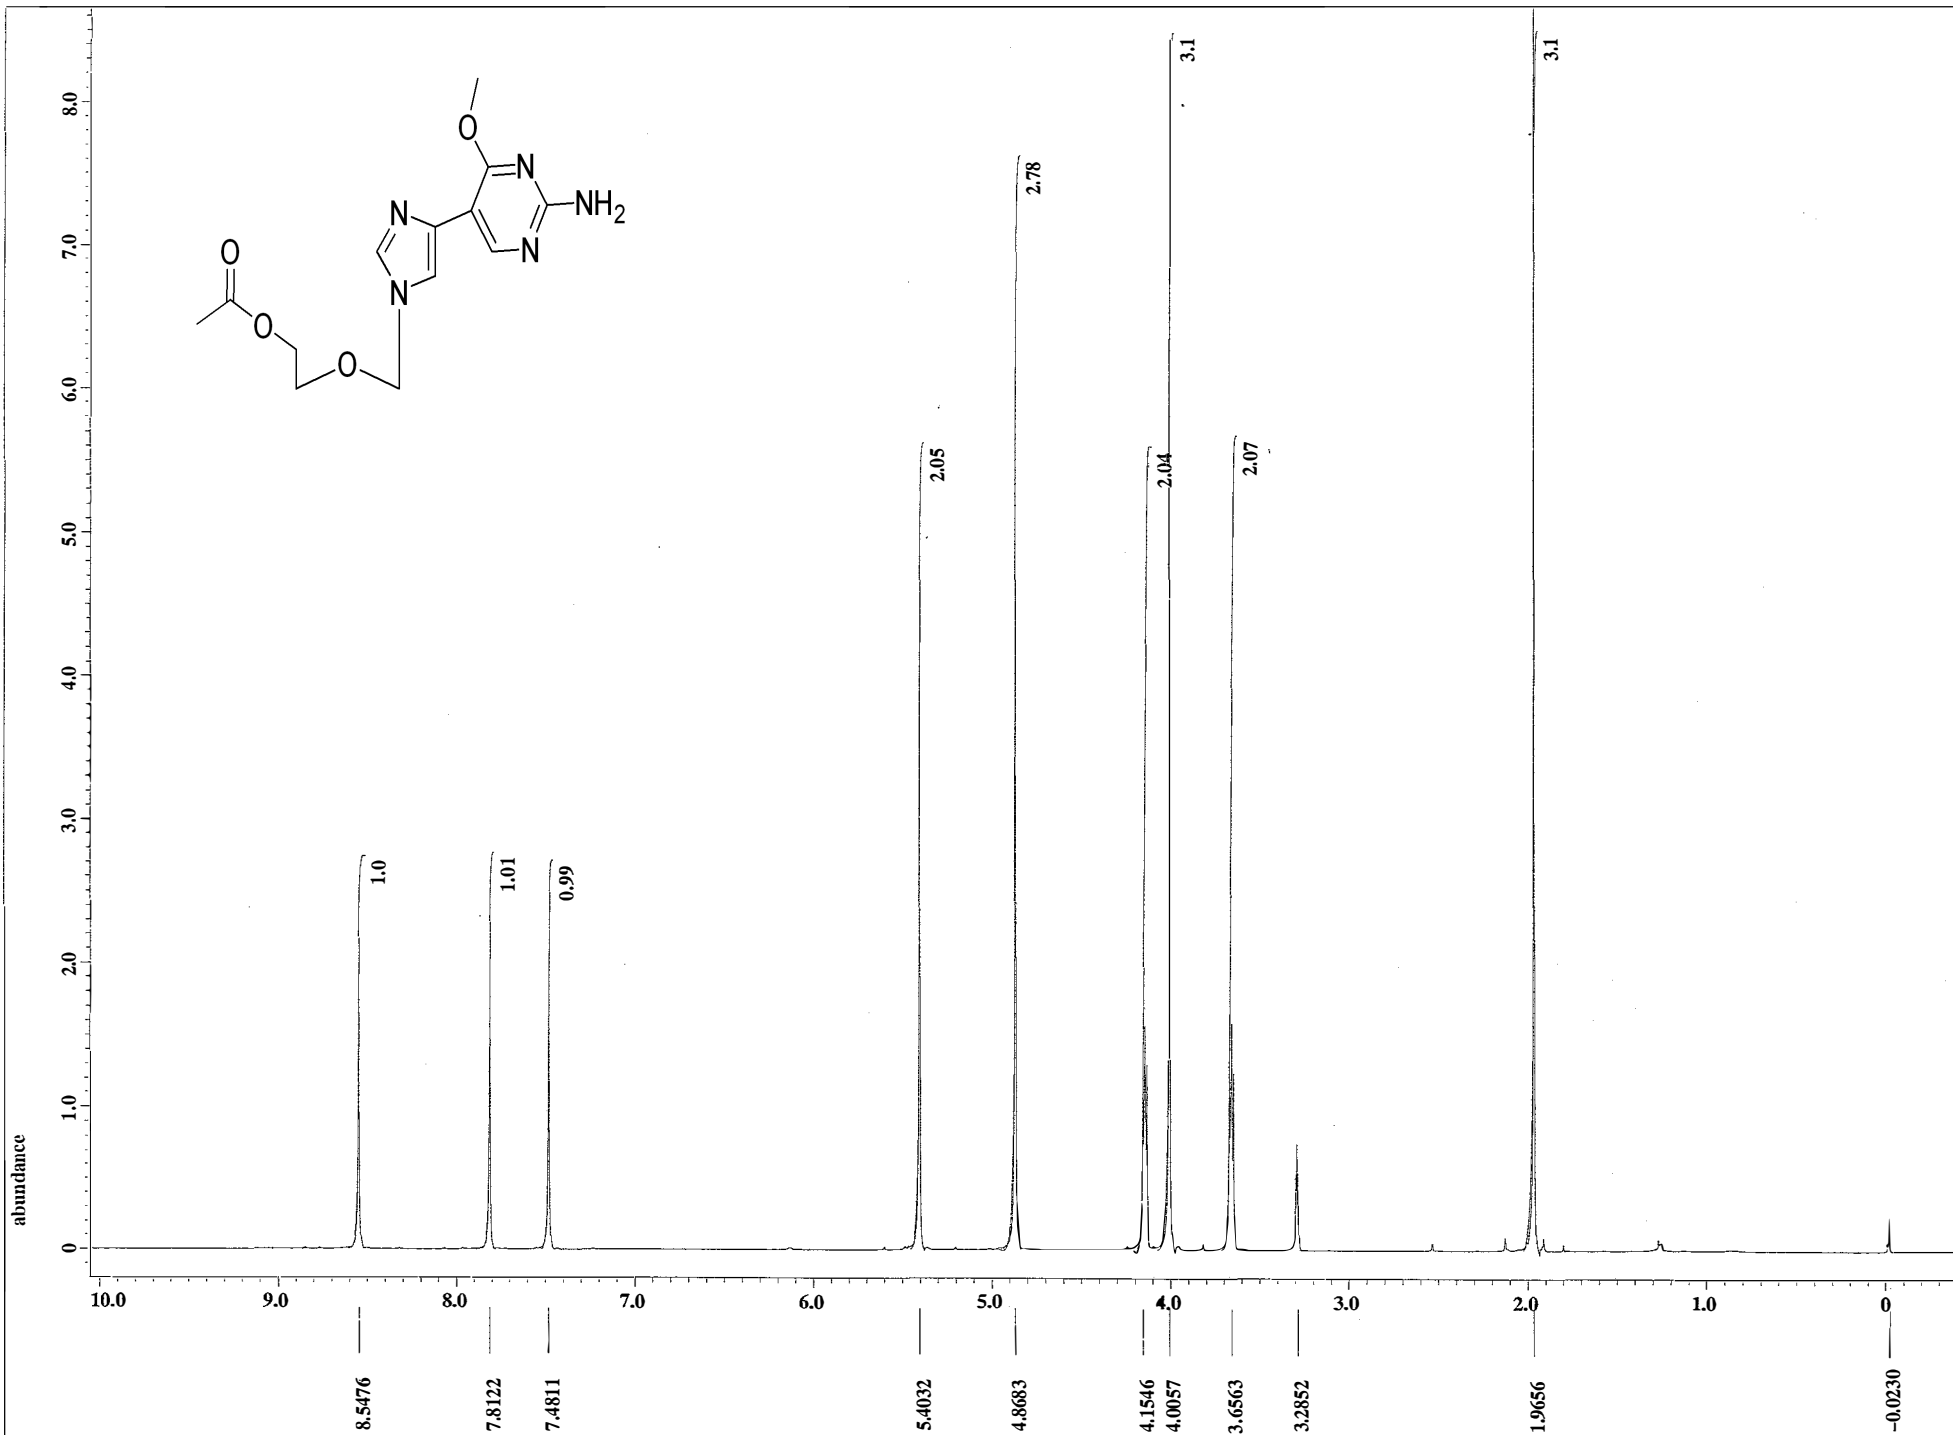

X : parts per Million : 1H

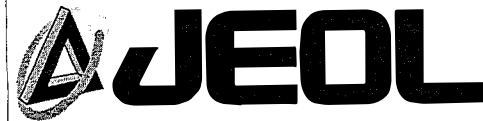

Filename = JET-2-1AC new procedu  
Author = Seley  
Experiment = single\_pulse\_dec  
Sample\_id = S#477284  
Solvent = METHANOL-D3  
Creation\_time = 12-MAY-2020 13:32:11  
Revision\_time = 12-MAY-2020 13:45:21  
Current\_time = 12-MAY-2020 13:45:37

Comment = single pulse decouple  
Data\_format = 1D COMPLEX  
Dim\_size = 26214  
Dim\_title = 13C  
Dim\_units = [ppm]  
Dimensions = x  
Site = ECX 400  
Spectrometer = DELTA2\_NMR

Field\_strength = 9.389766 [T] (400 [MHz])  
X\_acq\_duration = 1.04333312 [s]  
X\_domain = 13C  
X\_freq = 100.52530333 [MHz]  
X\_offset = 100 [ppm]  
X\_points = 32768  
X\_prescans = 4  
X\_resolution = 0.95846665 [Hz]  
X\_sweep = 31.40703518 [kHz]  
Irr\_domain = 1H  
Irr\_freq = 399.78219838 [MHz]  
Irr\_offset = 5 [ppm]  
Clipped = TRUE  
Mod\_return = 1  
Scans = 507  
Total\_scans = 507

X\_90\_width = 7 [us]  
X\_acq\_time = 1.04333312 [s]  
X\_angle = 30 [deg]  
X\_atn = 6 [dB]  
X\_pulse = 2.33333333 [us]  
Irr\_atn\_dec = 21.1 [dB]  
Irr\_atn\_noe = 21.1 [dB]  
Irr\_noise = WALTZ  
Decoupling = TRUE  
Initial\_wait = 1 [s]  
Noe = TRUE  
Noe\_time = 2 [s]  
Recvr\_gain = 60  
Relaxation\_delay = 2 [s]  
Repetition\_time = 3.04333312 [s]  
Temp\_get = 21.8 [dC]

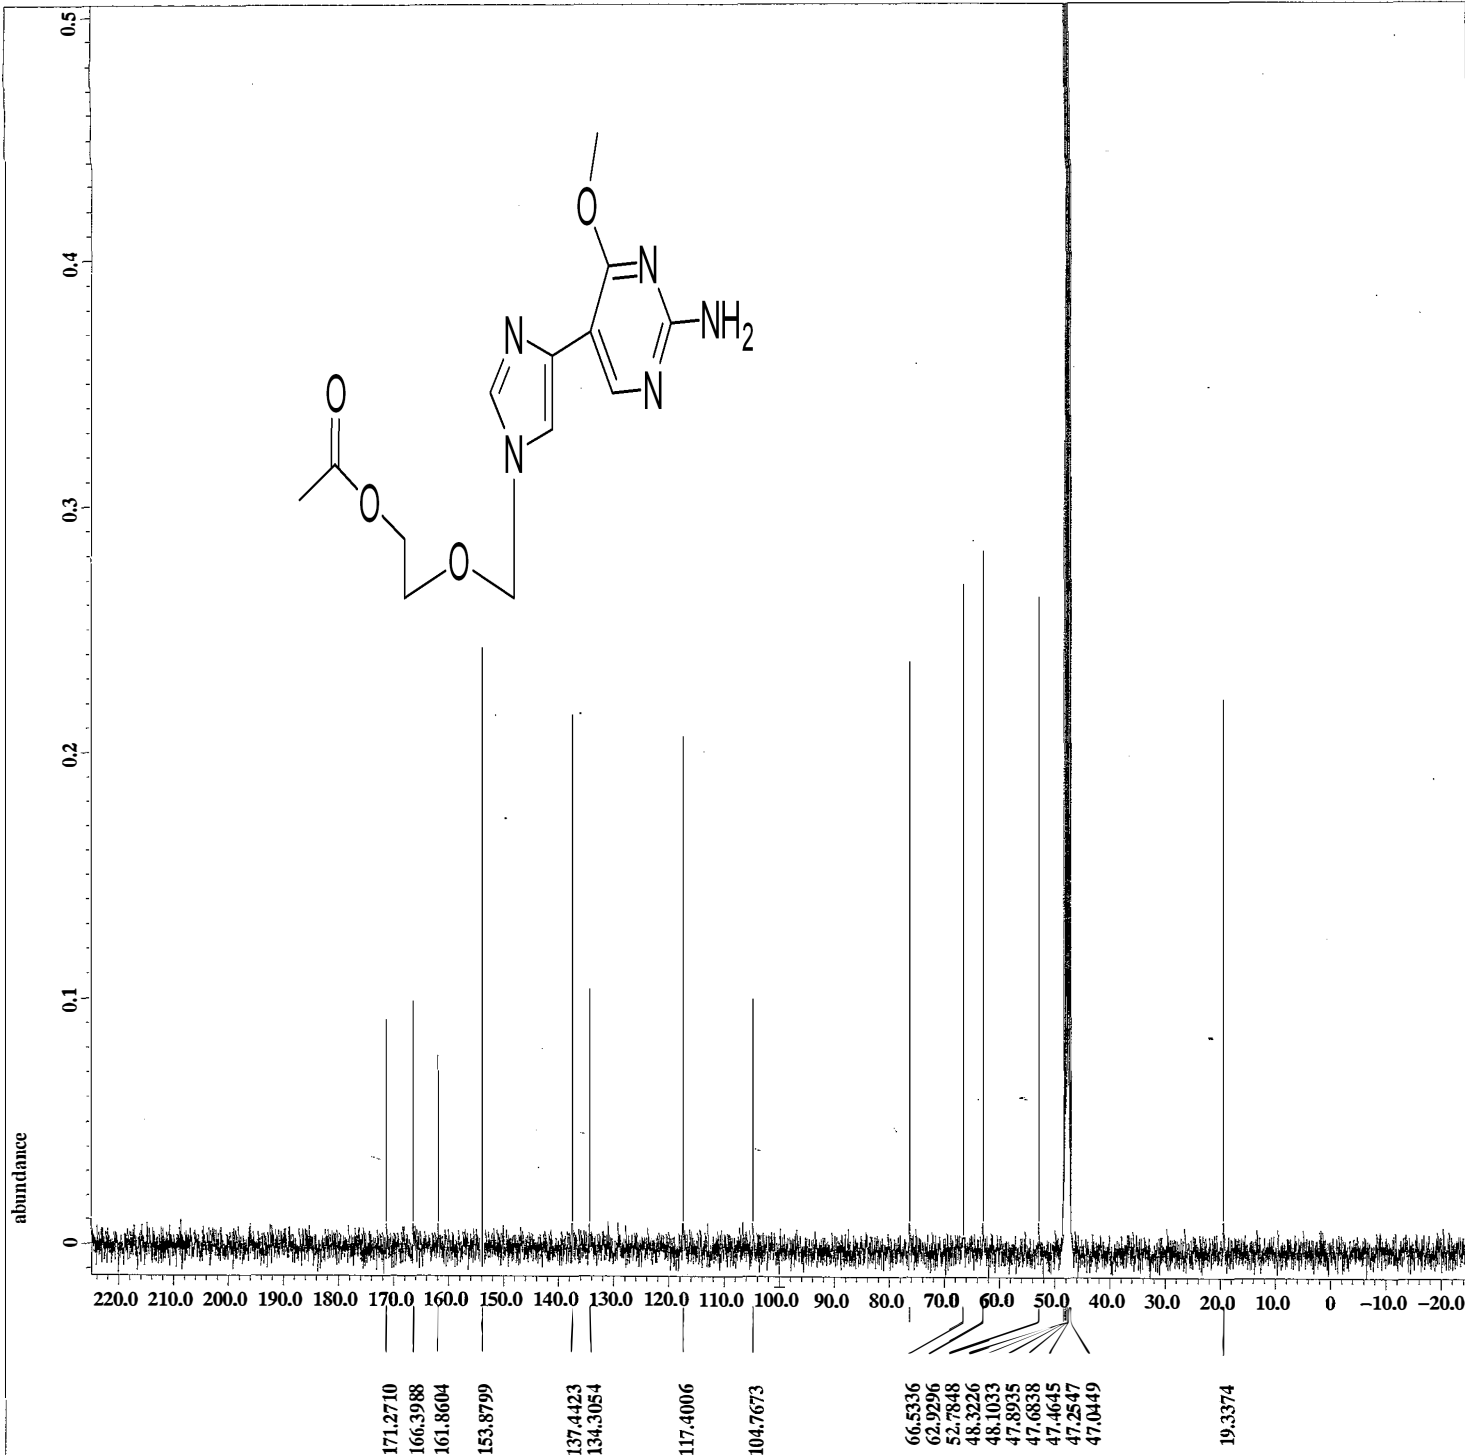

X : parts per Million : 13C



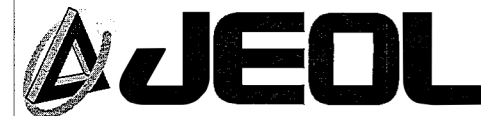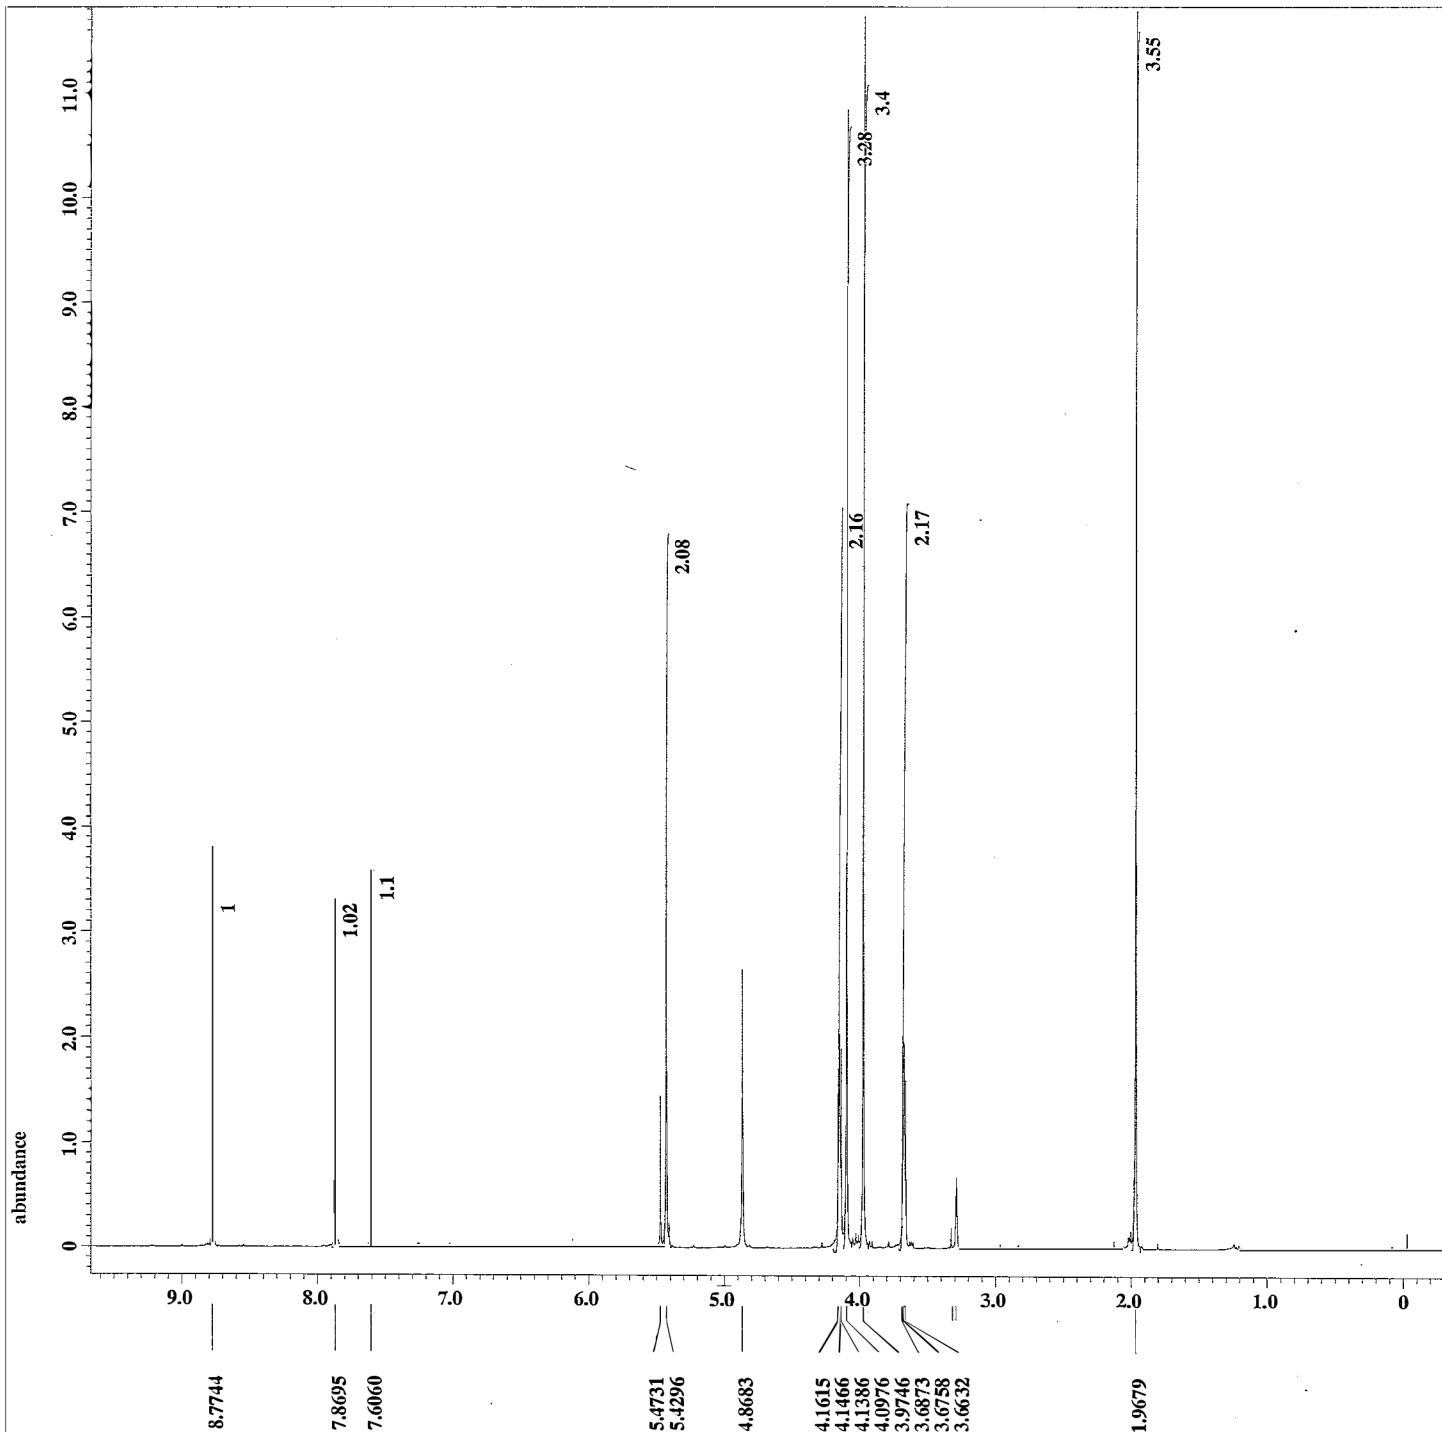

X : parts per Million : 1H

Filename = JET-2Ac-3.jdf  
Author = Seley  
Experiment = single\_pulse.ex2  
Sample\_id = S#427412  
Solvent = METHANOL-D3  
Creation\_time = 15-MAY-2020 11:43:57  
Revision\_time = 15-MAY-2020 12:00:55  
Current\_time = 15-MAY-2020 12:01:21

Comment = single\_pulse  
Data\_format = 1D COMPLEX  
Dim\_size = 13107  
Dim\_title = 1H  
Dim\_units = [ppm]  
Dimensions = X  
Site = ECX 400  
Spectrometer = DELTA2\_NMR

Field\_strength = 9.389766[T] (400 [MHz])  
X\_acq\_duration = 2.18365952[s]  
X\_domain = 1H  
X\_freq = 399.78219838 [MHz]  
X\_offset = 5 [ppm]  
X\_points = 16384  
X\_prescans = 1  
X\_resolution = 0.45794685 [Hz]  
X\_sweep = 7.5030012 [kHz]  
Irr\_domain = 1H  
Irr\_freq = 399.78219838 [MHz]  
Irr\_offset = 5 [ppm]  
Tri\_domain = 1H  
Tri\_freq = 399.78219838 [MHz]  
Tri\_offset = 5 [ppm]  
Clipped = FALSE  
Mod\_return = 1  
Scans = 16  
Total\_scans = 16

X\_90\_width = 13.5 [us]  
X\_acq\_time = 2.18365952 [s]  
X\_angle = 45 [deg]  
X\_atn = 3 [dB]  
X\_pulse = 6.75 [us]  
Irr\_mode = Off  
Tri\_mode = Off  
Dante\_presat = FALSE  
Initial\_wait = 1 [s]  
Recvr\_gain = 36  
Relaxation\_delay = 5 [s]  
Repetition\_time = 7.18365952 [s]  
Temp\_get = 403.6 [dC]

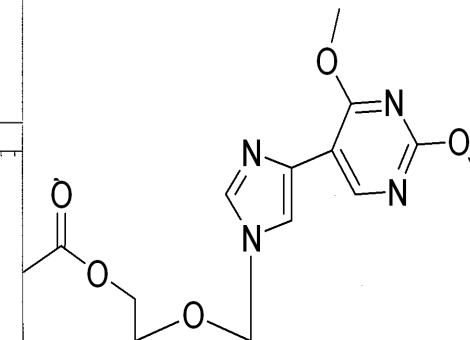

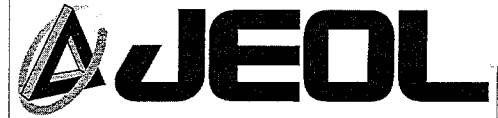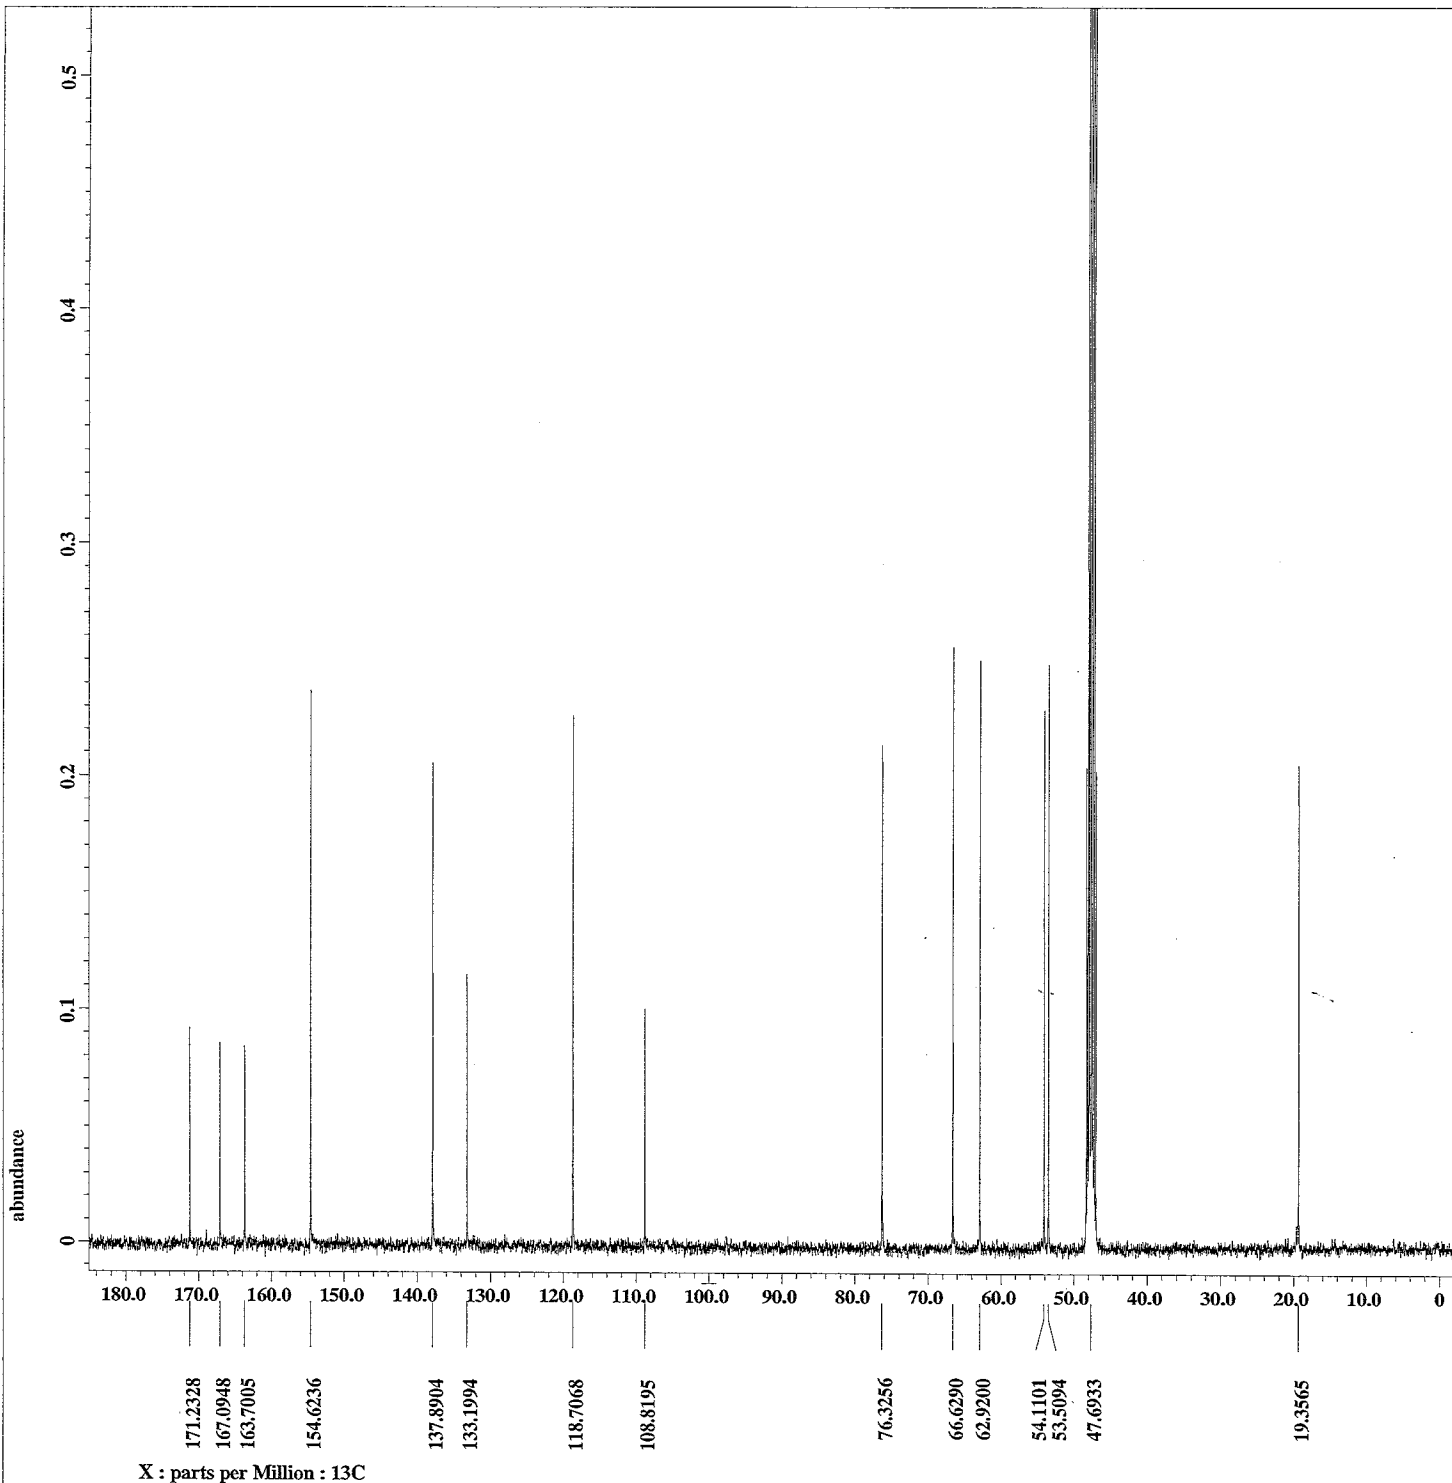

Filename = JET-2Ac-4.jdf  
Author = Seley  
Experiment = single\_pulse\_dec  
Sample\_id = S#430269  
Solvent = METHANOL-D3  
Creation\_time = 15-MAY-2020 12:14:19  
Revision\_time = 15-MAY-2020 12:28:04  
Current\_time = 15-MAY-2020 12:28:24

Comment = single pulse decouple  
Data\_format = 1D\_COMPLEX  
Dim\_size = 26214  
Dim\_title = 13C  
Dim\_units = [ppm]  
Dimensions = X  
Site = ECX 400  
Spectrometer = DELTA2\_NMR

Field\_strength = 9.389766 [T] (400 [MHz])  
X\_acq\_duration = 1.04333312 [s]  
X\_domain = 13C  
X\_freq = 100.52530333 [MHz]  
X\_offset = 100 [ppm]  
X\_points = 32768  
X\_prescans = 4  
X\_resolution = 0.95846665 [Hz]  
X\_sweep = 31.40703518 [kHz]  
Irr\_domain = 1H  
Irr\_freq = 399.78219838 [MHz]  
Irr\_offset = 5 [ppm]  
Clipped = FALSE  
Mod\_return = 1  
Scans = 535  
Total\_scans = 535

X\_90\_width = 7 [us]  
X\_acq\_time = 1.04333312 [s]  
X\_angle = 30 [deg]  
X\_atn = 6 [dB]  
X\_pulse = 2.33333333 [us]  
Irr\_atn\_dec = 21.1 [dB]  
Irr\_atn\_noe = 21.1 [dB]  
Irr\_noise = WALTZ  
Decoupling = TRUE  
Initial\_wait = 1 [s]  
Noe = TRUE  
Noe\_time = 2 [s]  
Recvr\_gain = 54  
Relaxation\_delay = 2 [s]  
Repetition\_time = 3.04333312 [s]  
Temp\_get = 404.1 [dC]

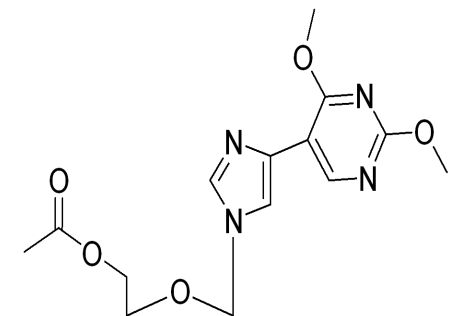

X : parts per Million : 13C

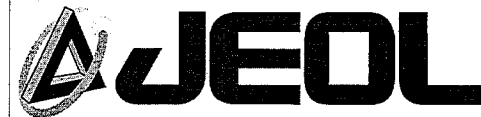

Filename = JET-2-023 1-MG-3.jdf  
Author = Seley  
Experiment = single\_pulse.ex2  
Sample\_id = S#611604  
Solvent = METHANOL-D3  
Creation\_time = 23-APR-2020 16:51:38  
Revision\_time = 23-APR-2020 17:08:57  
Current\_time = 23-APR-2020 17:09:16

Comment = single\_pulse  
Data\_format = 1D COMPLEX  
Dim\_size = 13107  
Dim\_title = 1H  
Dim\_units = [ppm]  
Dimensions = X  
Site = ECX 400  
Spectrometer = DELTA2\_NMR

Field\_strength = 9.389766 [T] (400 [MHZ])  
X\_acq\_duration = 2.18365952 [s]  
X\_domain = 1H  
X\_freq = 399.78219838 [MHZ]  
X\_offset = 5 [ppm]  
X\_points = 16384  
X\_prescans = 1  
X\_resolution = 0.45794685 [Hz]  
X\_sweep = 7.5030012 [kHz]  
Irr\_domain = 1H  
Irr\_freq = 399.78219838 [MHZ]  
Irr\_offset = 5 [ppm]  
Tri\_domain = 1H  
Tri\_freq = 399.78219838 [MHZ]  
Tri\_offset = 5 [ppm]  
Clipped = FALSE  
Mod\_return = 1  
Scans = 24  
Total\_scans = 24

X\_90\_width = 13.5 [us]  
X\_acq\_time = 2.18365952 [s]  
X\_angle = 45 [deg]  
X\_atn = 3 [dB]  
X\_pulse = 6.75 [us]  
Irr\_mode = Off  
Tri\_mode = Off  
Dante\_presat = FALSE  
Initial\_wait = 1 [s]  
Recvr\_gain = 30  
Relaxation\_delay = 5 [s]  
Repetition\_time = 7.18365952 [s]  
Temp\_get = 21.9 [dC]

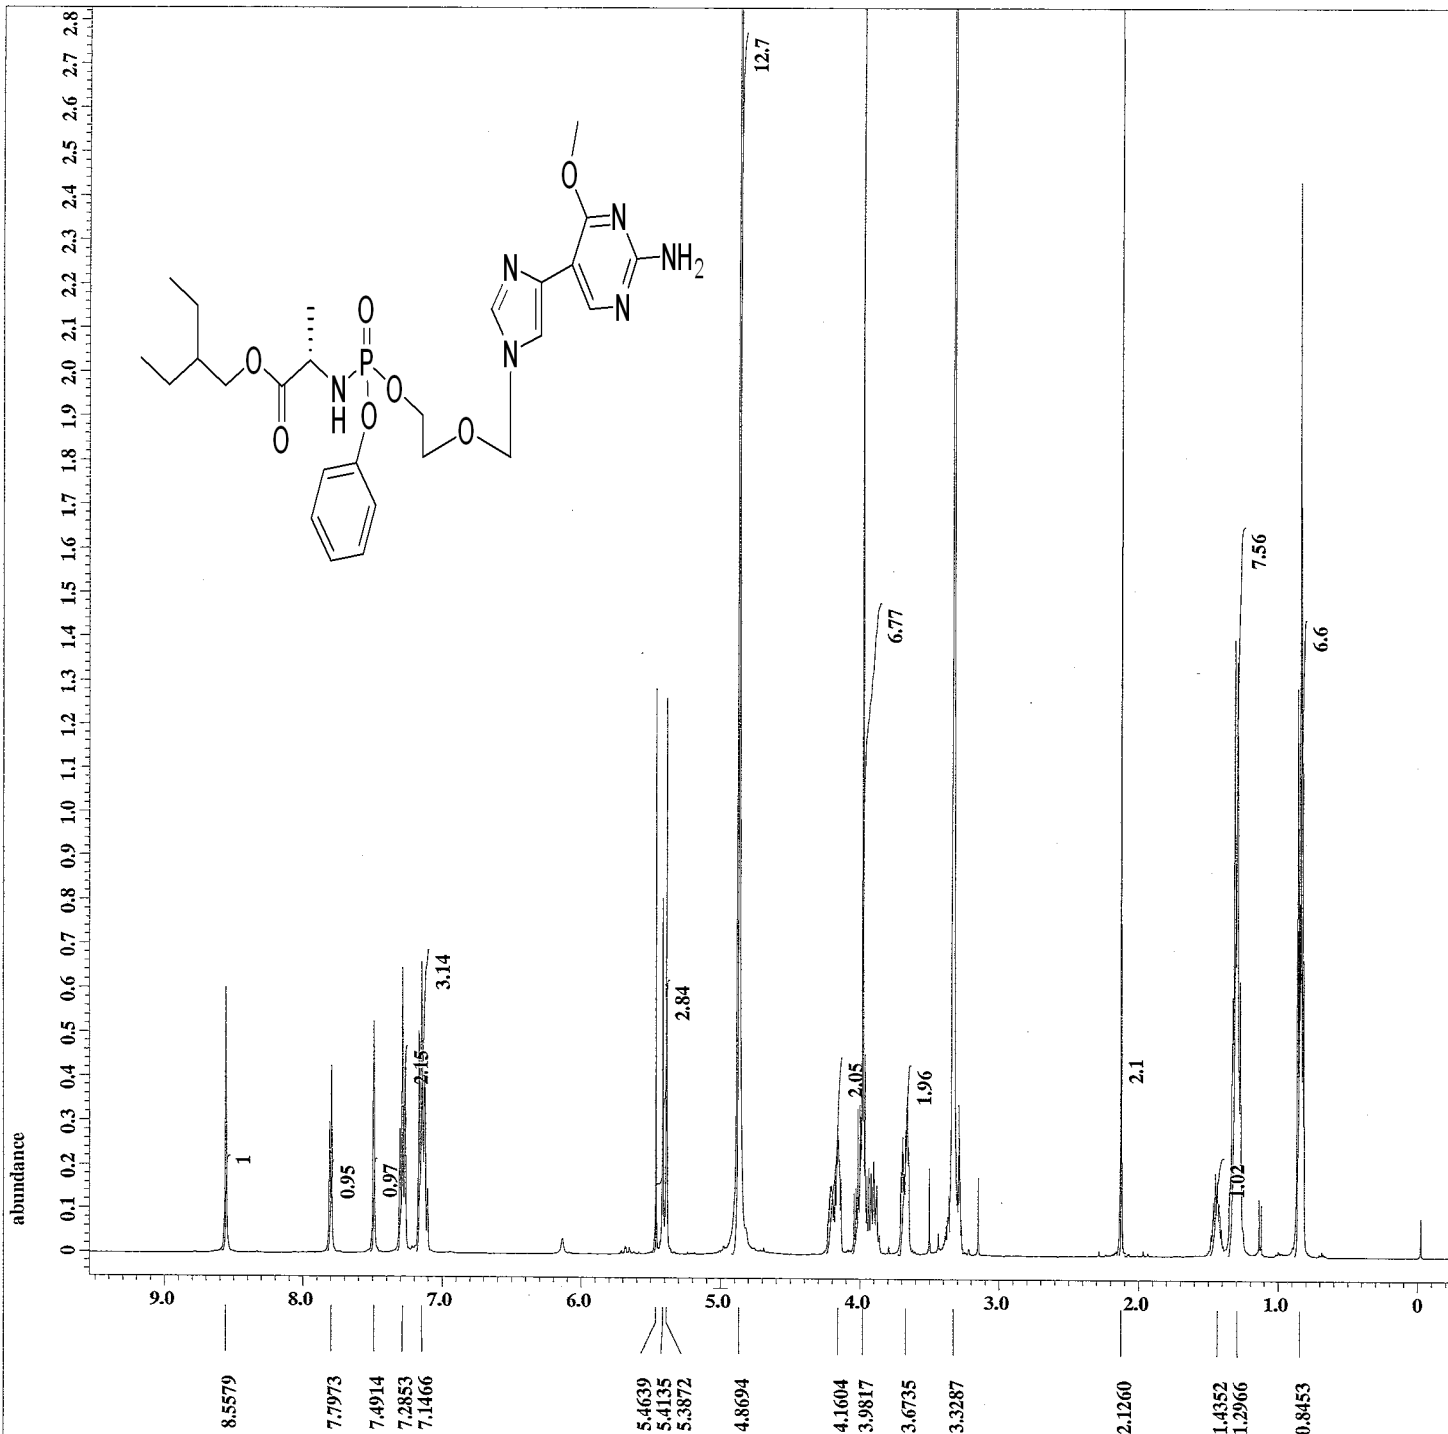

X : parts per Million : 1H

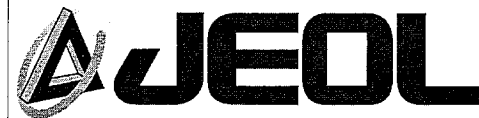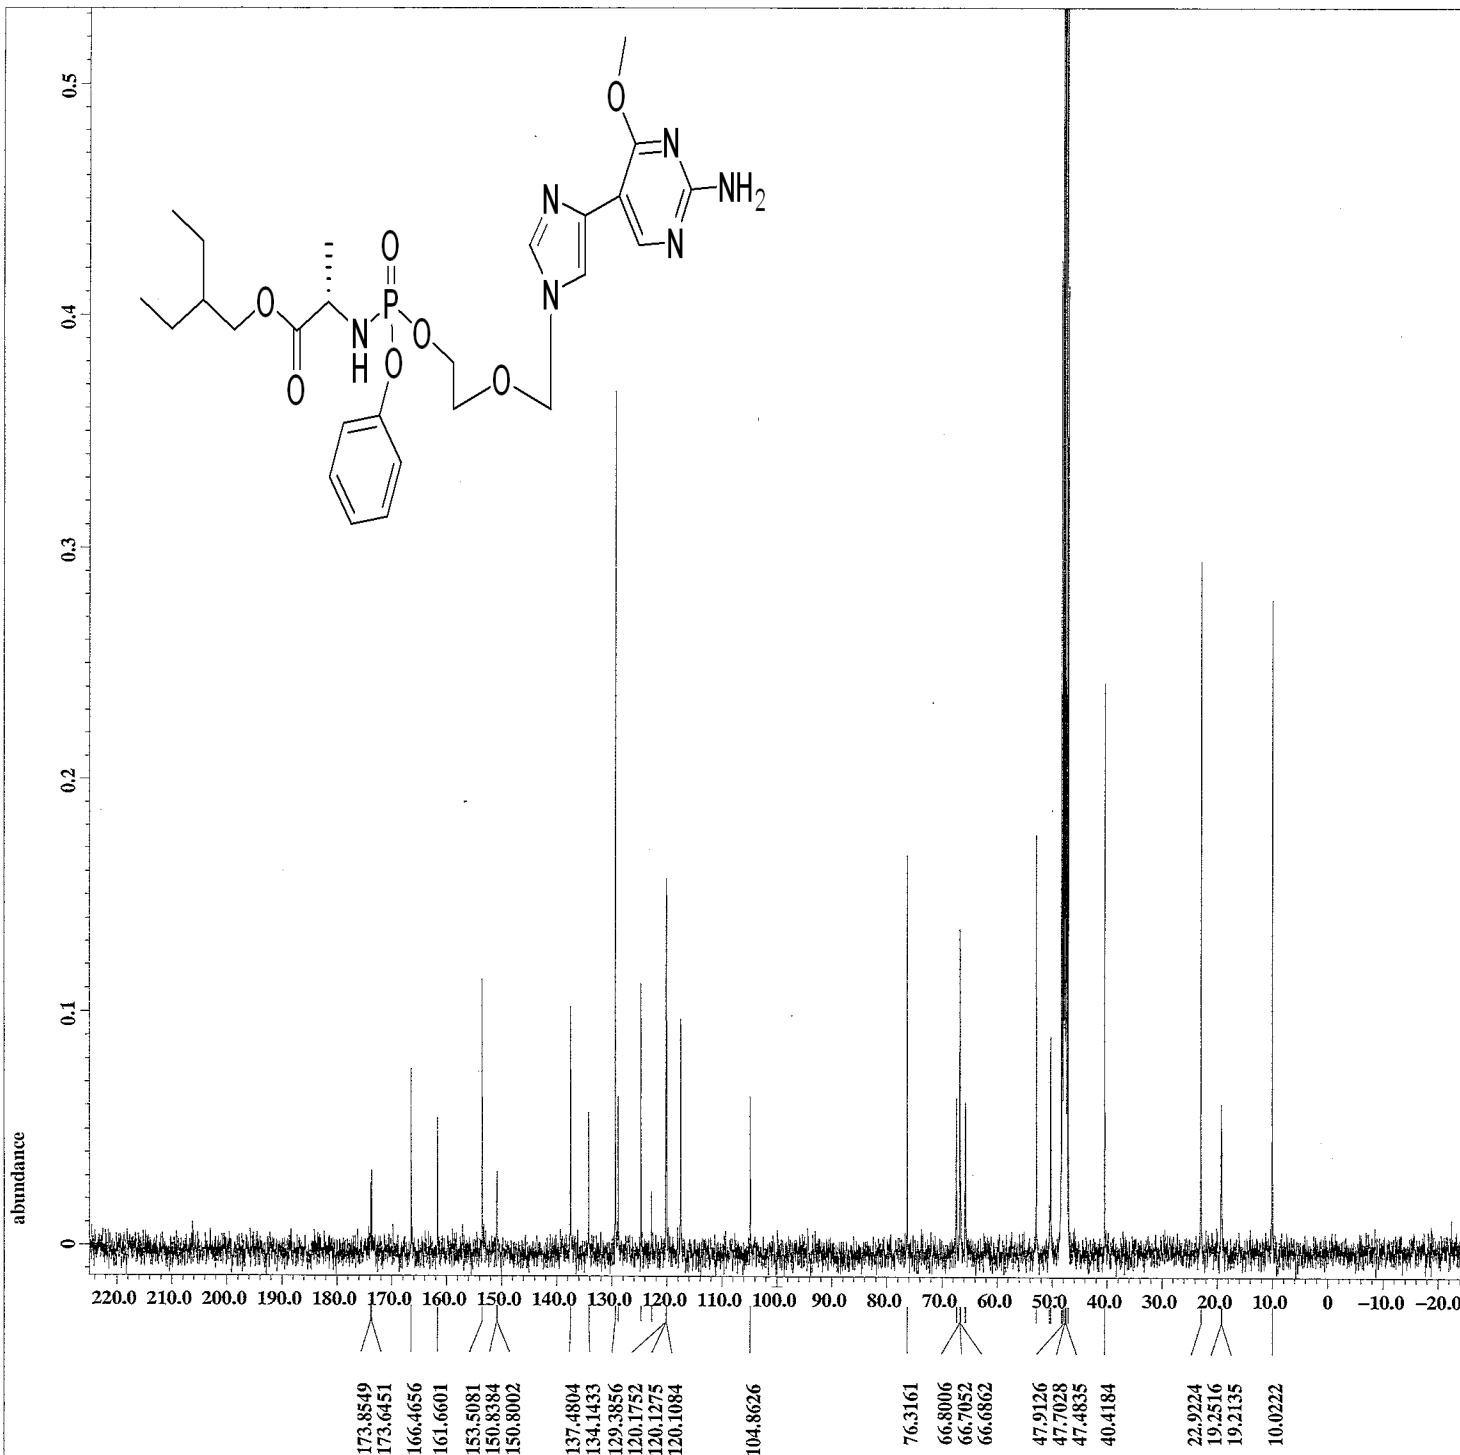

Filename = JET-1-MG-3.jdf  
Author = Seley  
Experiment = single\_pulse\_dec  
Sample\_id = S#411547  
Solvent = METHANOL-D3  
Creation\_time = 25-JUN-2020 11:36:59  
Revision\_time = 25-JUN-2020 11:53:32  
Current\_time = 25-JUN-2020 11:54:23

Comment = single pulse decouple  
Data\_format = 1D\_COMPLEX  
Dim\_size = 26214  
Dim\_title = 13C  
Dim\_units = [ppm]  
Dimensions = X  
Site = ECX 400  
Spectrometer = DELTA2\_NMR

Field\_strength = 9.389766 [T] (400 [MHz])  
X\_acq\_duration = 1.04333312 [s]  
X\_domain = 13C  
X\_freq = 100.52530333 [MHz]  
X\_offset = 100 [ppm]  
X\_points = 32768  
X\_prescans = 4  
X\_resolution = 0.95846665 [Hz]  
X\_sweep = 31.40703518 [kHz]  
Irr\_domain = 1H  
Irr\_freq = 399.78219838 [MHz]  
Irr\_offset = 5 [ppm]  
Clipped = FALSE  
Mod\_return = 1  
Scans = 428  
Total\_scans = 428

X\_90\_width = 7 [us]  
X\_acq\_time = 1.04333312 [s]  
X\_angle = 30 [deg]  
X\_atn = 6 [dB]  
X\_pulse = 2.33333333 [us]  
Irr\_atn\_dec = 21.1 [dB]  
Irr\_atn\_noe = 21.1 [dB]  
Irr\_noise = WALTZ  
Decoupling = TRUE  
Initial\_wait = 1 [s]  
Noe = TRUE  
Noe\_time = 2 [s]  
Recvr\_gain = 60  
Relaxation\_delay = 2 [s]  
Repetition\_time = 3.04333312 [s]  
Temp\_get = 22.7 [dC]

X : parts per Million : 13C

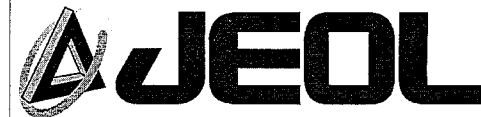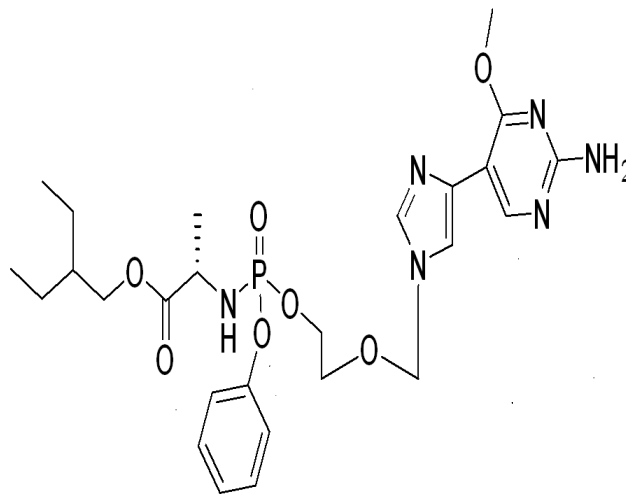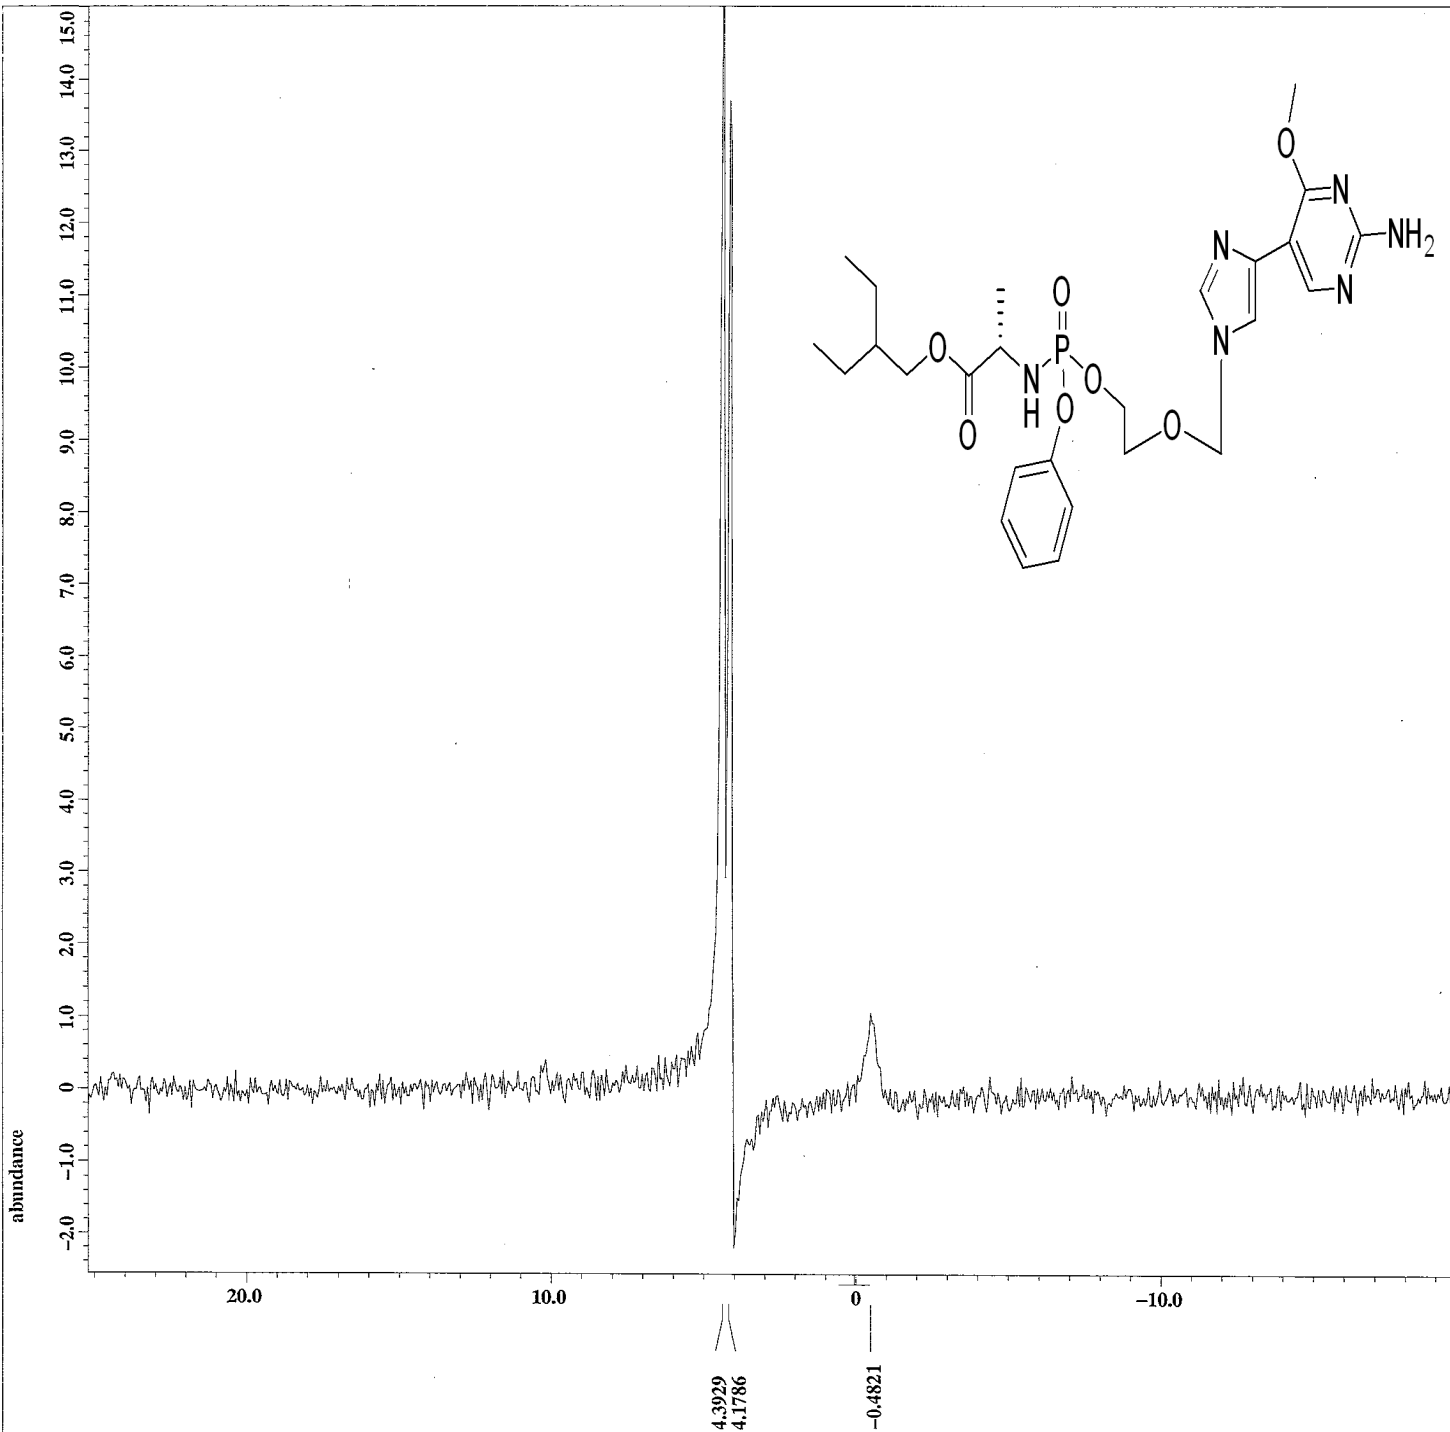

X : parts per Million : 31P

Filename = JET-1MG Phosphorous-3  
Author = Seley  
Experiment = single\_pulse.ex2  
Sample\_id = S#429200  
Solvent = METHANOL-D3  
Creation\_time = 25-JUN-2020 11:45:02  
Revision\_time = 25-JUN-2020 11:58:42  
Current\_time = 25-JUN-2020 11:59:04

Comment = single\_pulse  
Data\_format = 1D\_COMPLEX  
Dim\_size = 13107  
Dim\_title = 31P  
Dim\_units = [ppm]  
Dimensions = X  
Site = ECX 400  
Spectrometer = DELTA2\_NMR

Field\_strength = 9.389766[T] (400[MHz])  
X\_acq\_duration = 0.11534336[s]  
X\_domain = 31P  
X\_freq = 161.83469309[MHz]  
X\_offset = 0[ppm]  
X\_points = 16384  
X\_prescans = 1  
X\_resolution = 8.66976651[Hz]  
X\_sweep = 142.04545455[kHz]  
Irr\_domain = 31P  
Irr\_freq = 161.83469309[MHz]  
Irr\_offset = 5[ppm]  
Tri\_domain = 31P  
Tri\_freq = 161.83469309[MHz]  
Tri\_offset = 5[ppm]  
Clipped = FALSE  
Mod\_return = 1  
Scans = 16  
Total\_scans = 16

X\_90\_width = 16.2[us]  
X\_acq\_time = 0.11534336[s]  
X\_angle = 45[deg]  
X\_atn = 3[dB]  
X\_pulse = 8.1[us]  
Irr\_mode = Off  
Tri\_mode = Off  
Dante\_presat = FALSE  
Initial\_wait = 1[s]  
Recvr\_gain = 56  
Relaxation\_delay = 5[s]  
Repetition\_time = 5.11534336[s]  
Temp\_get = 22.5[degC]

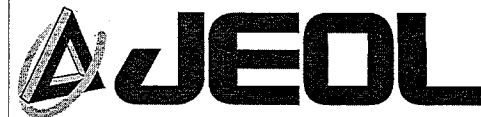

Filename = JET-2MG-3.jdf  
Author = Seley  
Experiment = single\_pulse.ex2  
Sample\_id = S#446794  
Solvent = CHLOROFORM-D  
Creation\_time = 1-JUN-2020 12:16:33  
Revision\_time = 1-JUN-2020 12:45:55  
Current\_time = 1-JUN-2020 12:46:08

Comment = single\_pulse  
Data\_format = 1D COMPLEX  
Dim\_size = 13107  
Dim\_title = 1H  
Dim\_units = [ppm]  
Dimensions = X  
Site = ECX 400  
Spectrometer = DELTA2\_NMR

Field\_strength = 9.389766 [T] (400 [MHz])  
X\_acq\_duration = 2.18365952 [s]  
X\_domain = 1H  
X\_freq = 399.78219838 [MHz]  
X\_offset = 5 [ppm]  
X\_points = 16384  
X\_prescans = 1  
X\_resolution = 0.45794685 [Hz]  
X\_sweep = 7.5030012 [kHz]  
Irr\_domain = 1H  
Irr\_freq = 399.78219838 [MHz]  
Irr\_offset = 5 [ppm]  
Tri\_domain = 1H  
Tri\_freq = 399.78219838 [MHz]  
Tri\_offset = 5 [ppm]  
Clipped = FALSE  
Mod\_return = 1  
Scans = 16  
Total\_scans = 16

X\_90\_width = 13.5 [us]  
X\_acq\_time = 2.18365952 [s]  
X\_angle = 45 [deg]  
X\_atn = 3 [dB]  
X\_pulse = 6.75 [us]  
Irr\_mode = Off  
Tri\_mode = Off  
Dante\_presat = FALSE  
Initial\_wait = 1 [s]  
Recvr\_gain = 32  
Relaxation\_delay = 5 [s]  
Repetition\_time = 7.18365952 [s]  
Temp\_get = 19.6 [dC]

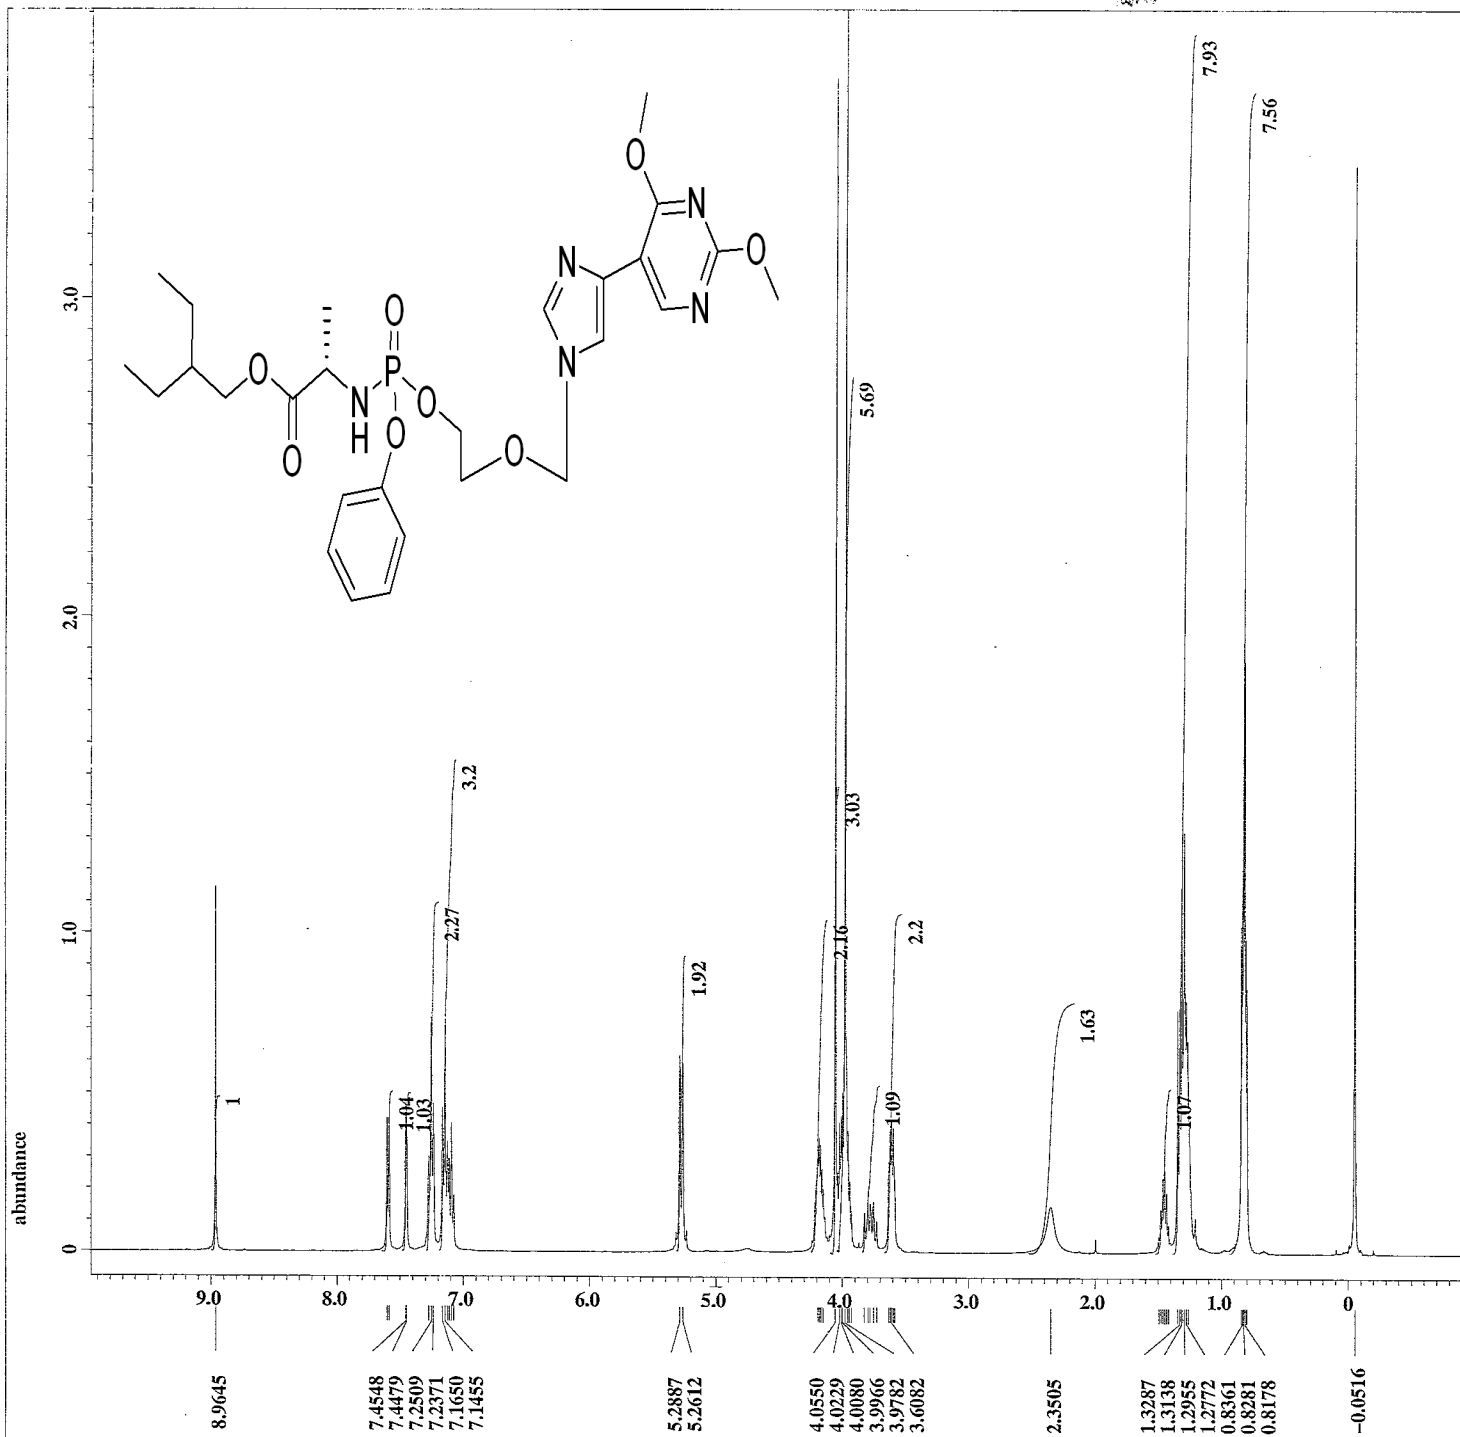

X : parts per Million : 1H

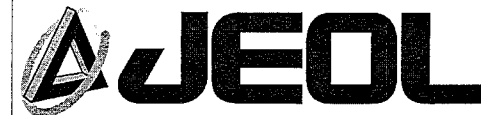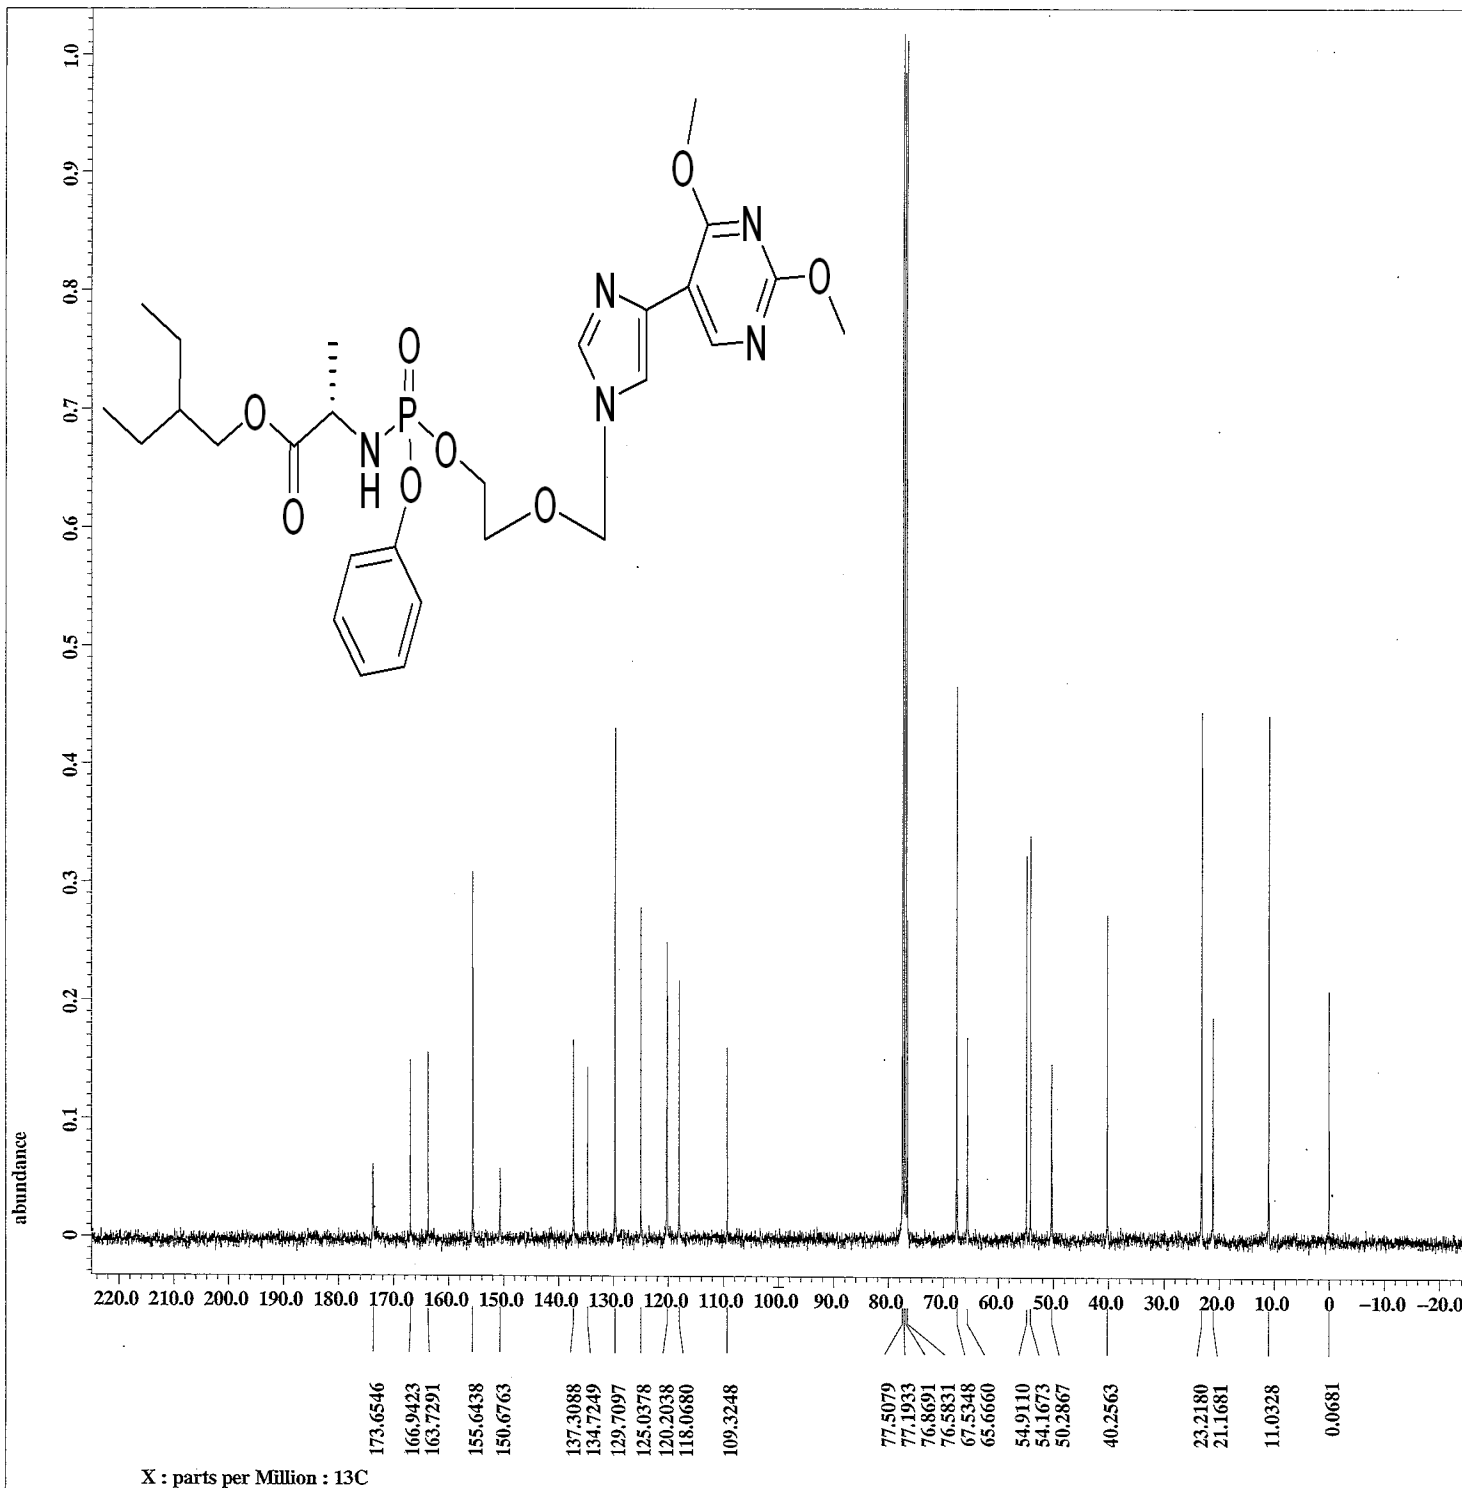

Filename = JET-2MG-4.jdf  
Author = Seley  
Experiment = single\_pulse\_dec  
Sample\_id = S#449657  
Solvent = CHLOROFORM-D  
Creation\_time = 1-JUN-2020 12:46:21  
Revision\_time = 1-JUN-2020 13:00:13  
Current\_time = 1-JUN-2020 13:00:16

Comment = single pulse decouple  
Data\_format = 1D COMPLEX  
Dim\_size = 26214  
Dim\_title = 13C  
Dim\_units = [ppm]  
Dimensions = X  
Site = ECK 400  
Spectrometer = DELTA2\_NMR

Field\_strength = 9.389766 [T] (400 [MHz])  
X\_acq\_duration = 1.0433312 [s]  
X\_domain = 13C  
X\_freq = 100.52530333 [MHz]  
X\_offset = 100 [ppm]  
X\_points = 32768  
X\_prescans = 4  
X\_resolution = 0.95846665 [Hz]  
X\_sweep = 31.40703518 [kHz]  
Irr\_domain = 1H  
Irr\_freq = 399.78219838 [MHz]  
Irr\_offset = 5 [ppm]  
Clipped = TRUE  
Mod\_return = 1  
Scans = 528  
Total\_scans = 528

X\_90\_width = 7 [us]  
X\_acq\_time = 1.0433312 [s]  
X\_angle = 30 [deg]  
X\_atn = 6 [dB]  
X\_pulse = 2.33333333 [us]  
Irr\_atn\_dec = 21.1 [dB]  
Irr\_atn\_noe = 21.1 [dB]  
Irr\_noise = WALTZ  
Decoupling = TRUE  
Initial\_wait = 1 [s]  
Noe = TRUE  
Noe\_time = 2 [s]  
Recvr\_gain = 60  
Relaxation\_delay = 2 [s]  
Repetition\_time = 3.0433312 [s]  
Temp\_get = 19.8 [dC]

MY-4-79\_1108\_dry 1 1 /home/SeleyGroup

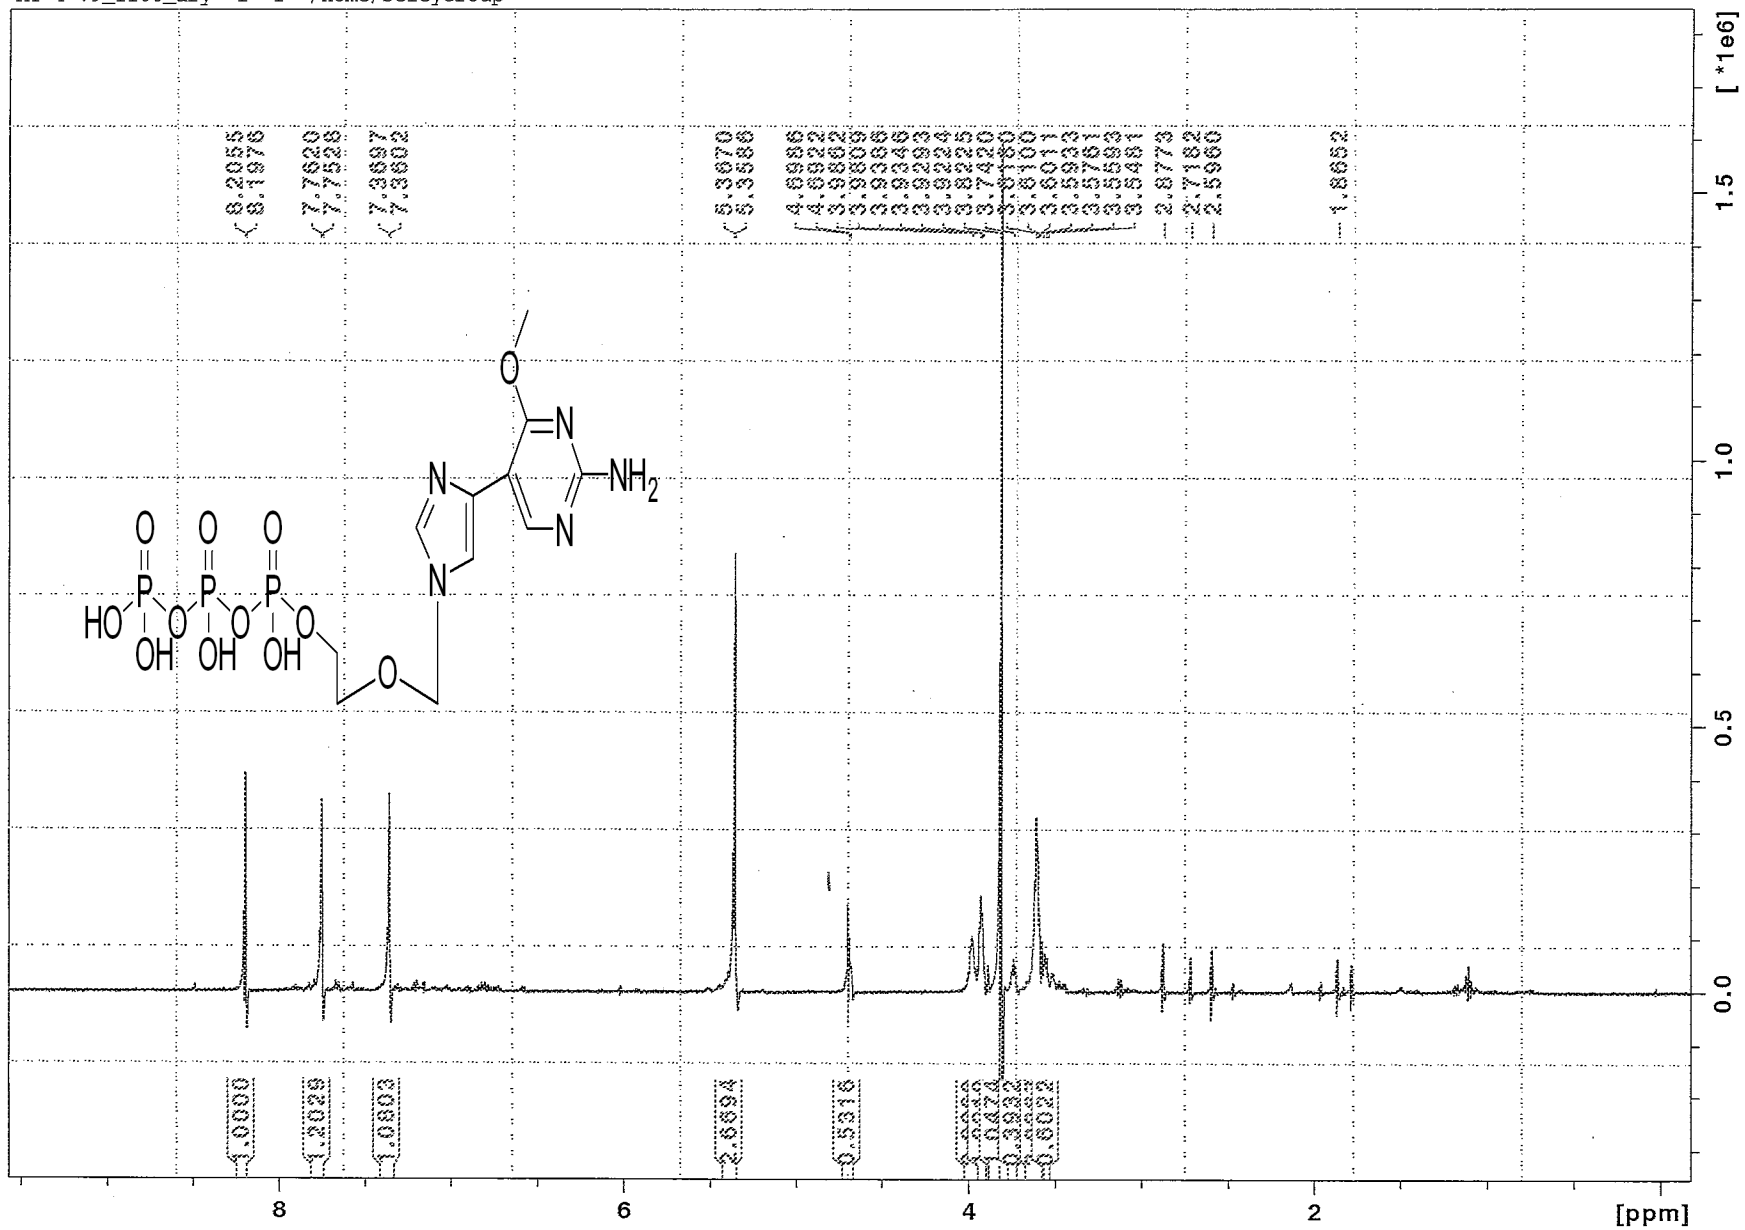

H<sub>2</sub>O



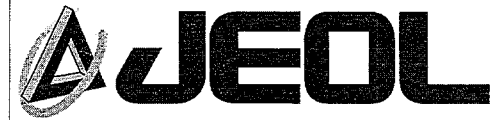

Filename = MY-1-219.2-ttw4 -2.jd  
Author = Seley  
Experiment = single\_pulse.ex2  
Sample\_id = S#385127  
Solvent = D2O  
Creation\_time = 19-DEC-2016 10:57:55  
Revision\_time = 19-DEC-2016 10:46:49  
Current\_time = 19-DEC-2016 10:46:58

Comment = single\_pulse  
Data\_format = 1D COMPLEX  
Dim\_size = 13107  
Dim\_title = 31P  
Dim\_units = [ppm]  
Dimensions = X  
Site = ECX 400  
Spectrometer = DELTA2\_NMR

Field\_strength = 9.389766[T] (400[MHz])  
X\_acq\_duration = 1.15605504[s]  
X\_domain = 31P  
X\_freq = 161.83469309[MHz]  
X\_offset = 0[ppm]  
X\_points = 16384  
X\_prescans = 1  
X\_resolution = 0.86501072[Hz]  
X\_sweep = 14.1723356[kHz]  
Irr\_domain = 31P  
Irr\_freq = 161.83469309[MHz]  
Irr\_offset = 5[ppm]  
Tri\_domain = 31P  
Tri\_freq = 161.83469309[MHz]  
Tri\_offset = 5[ppm]  
Clipped = FALSE  
Mod\_return = 1  
Scans = 32  
Total\_scans = 32

X\_90\_width = 16.2[us]  
X\_acq\_time = 1.15605504[s]  
X\_angle = 45[deg]  
X\_atn = 3[dB]  
X\_pulse = 8.1[us]  
Irr\_mode = Off  
Tri\_mode = Off  
Dante\_preset = FALSE  
Initial\_wait = 1[s]  
Recvr\_gain = 68  
Relaxation\_delay = 5[s]  
Repetition\_time = 6.15605504[s]  
Temp\_get = 22.3[degC]

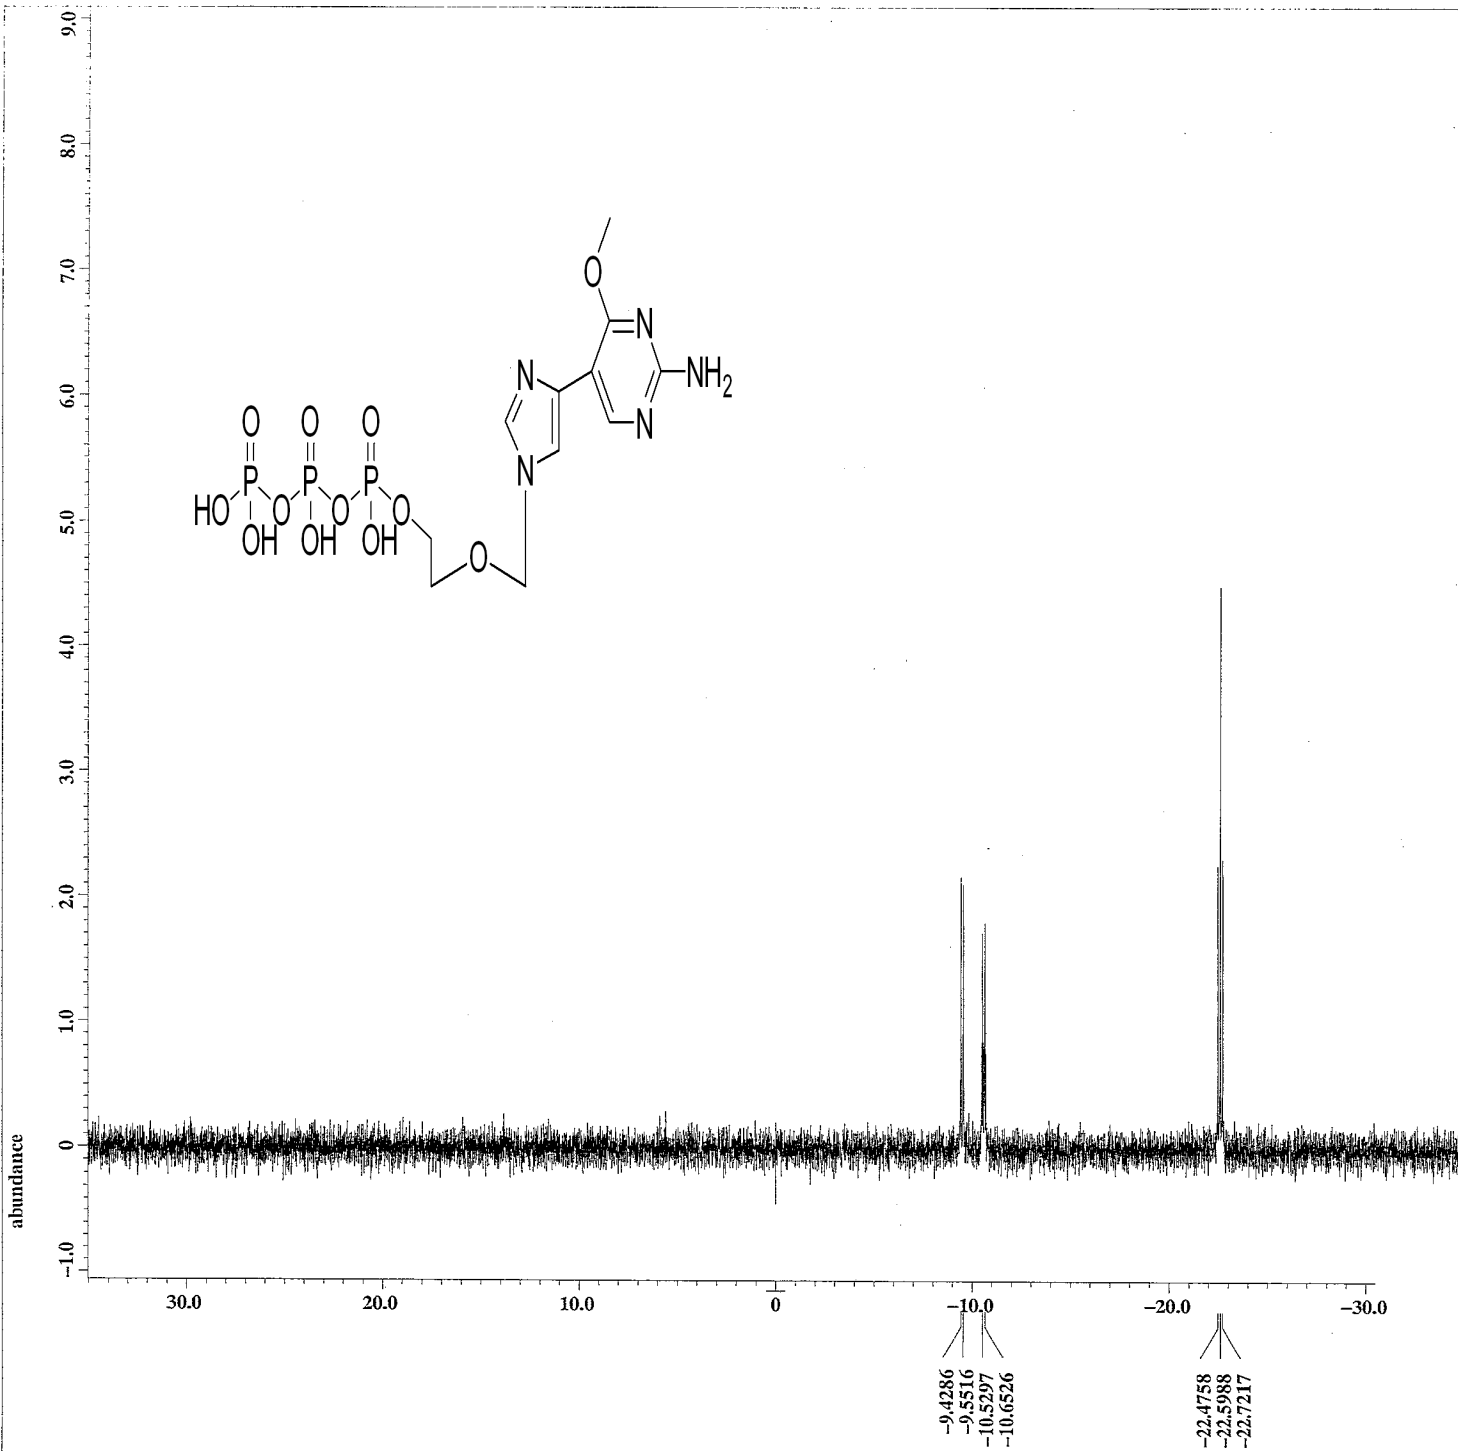

X : parts per Million : 31P

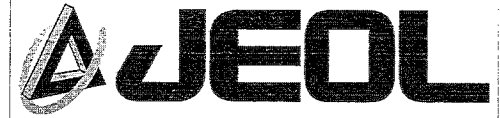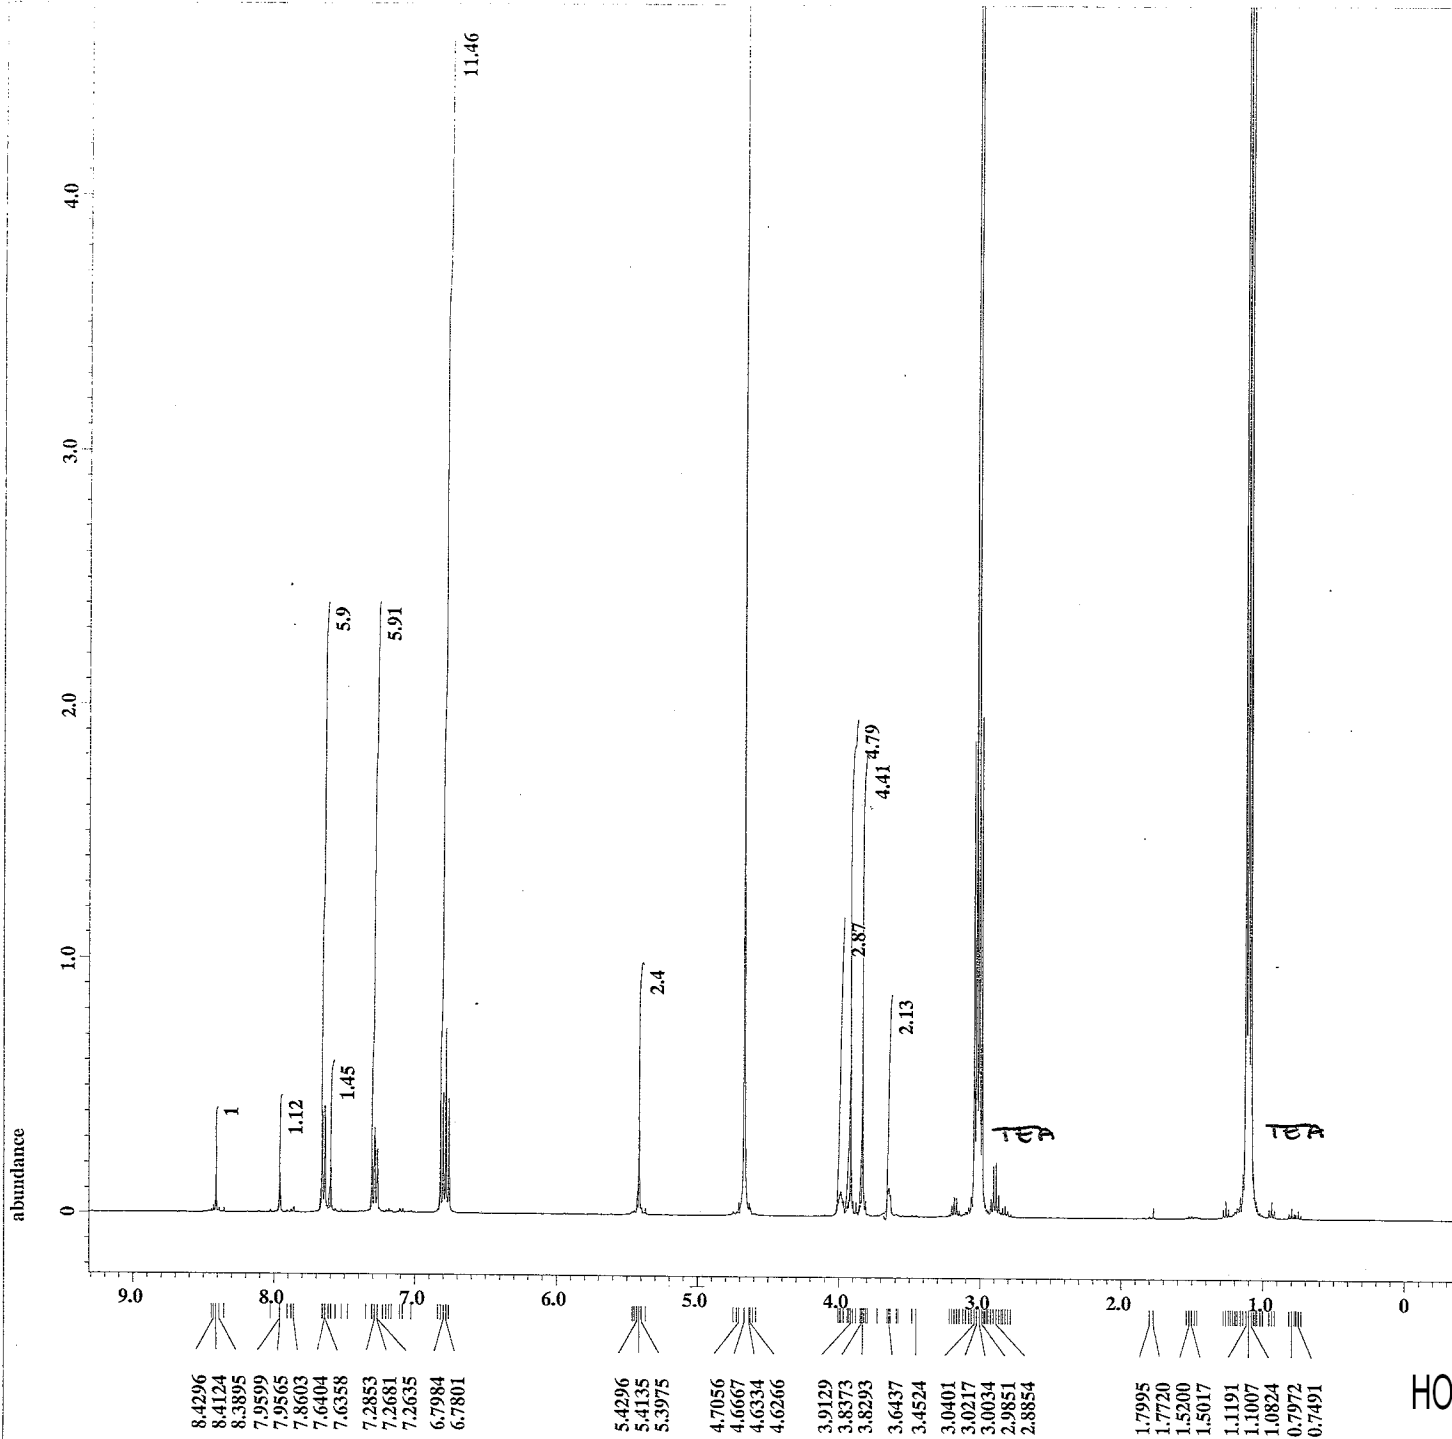

Filename = MY-4-003\_lyoph\_0327-3  
Author = Seley  
Experiment = single\_pulse.ex2  
Sample\_id = S#467455  
Solvent = D2O  
Creation\_time = 27-MAR-2018 12:03:00  
Revision\_time = 27-MAR-2018 13:04:29  
Current\_time = 27-MAR-2018 13:04:56

Comment = single\_pulse  
Data\_format = 1D\_COMPLEX  
Dim\_size = 13107  
Dim\_title = 1H  
Dim\_units = [ppm]  
Dimensions = X  
Site = ECX 400  
Spectrometer = DELTA2\_NMR

Field\_strength = 9.389766 [T] (400 [MHz])  
X\_acq\_duration = 2.18365952 [s]  
X\_domain = 1H  
X\_freq = 399.78219838 [MHz]  
X\_offset = 5 [ppm]  
X\_points = 16384  
X\_prescans = 1  
X\_resolution = 0.45794685 [Hz]  
X\_sweep = 7.5030012 [kHz]  
Irr\_domain = 1H  
Irr\_freq = 399.78219838 [MHz]  
Irr\_offset = 5 [ppm]  
Tri\_domain = 1H  
Tri\_freq = 399.78219838 [MHz]  
Tri\_offset = 5 [ppm]  
Clipped = FALSE  
Mod\_return = 1  
Scans = 8  
Total\_scans = 8

X\_90\_width = 13.5 [us]  
X\_acq\_time = 2.18365952 [s]  
X\_angle = 45 [deg]  
X\_atn = 3 [dB]  
X\_pulse = 6.75 [us]  
Irr\_mode = Off  
Tri\_mode = Off  
Dante\_preset = FALSE  
Initial\_wait = 1 [s]  
Recvr\_gain = 40  
Relaxation\_delay = 5 [s]  
Repetition\_time = 7.18365952 [s]  
Temp\_get = 21.9 [dC]

X : parts per Million : 1H

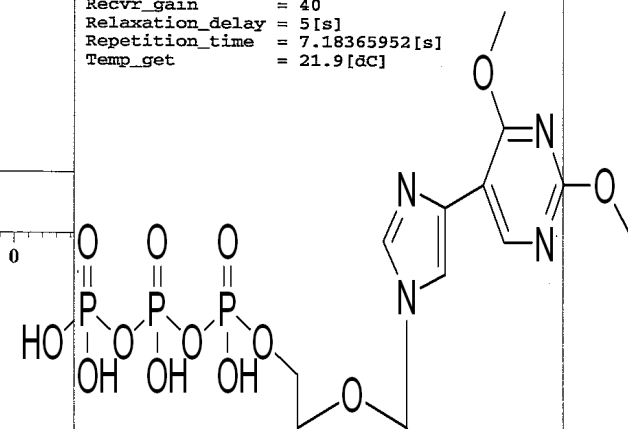

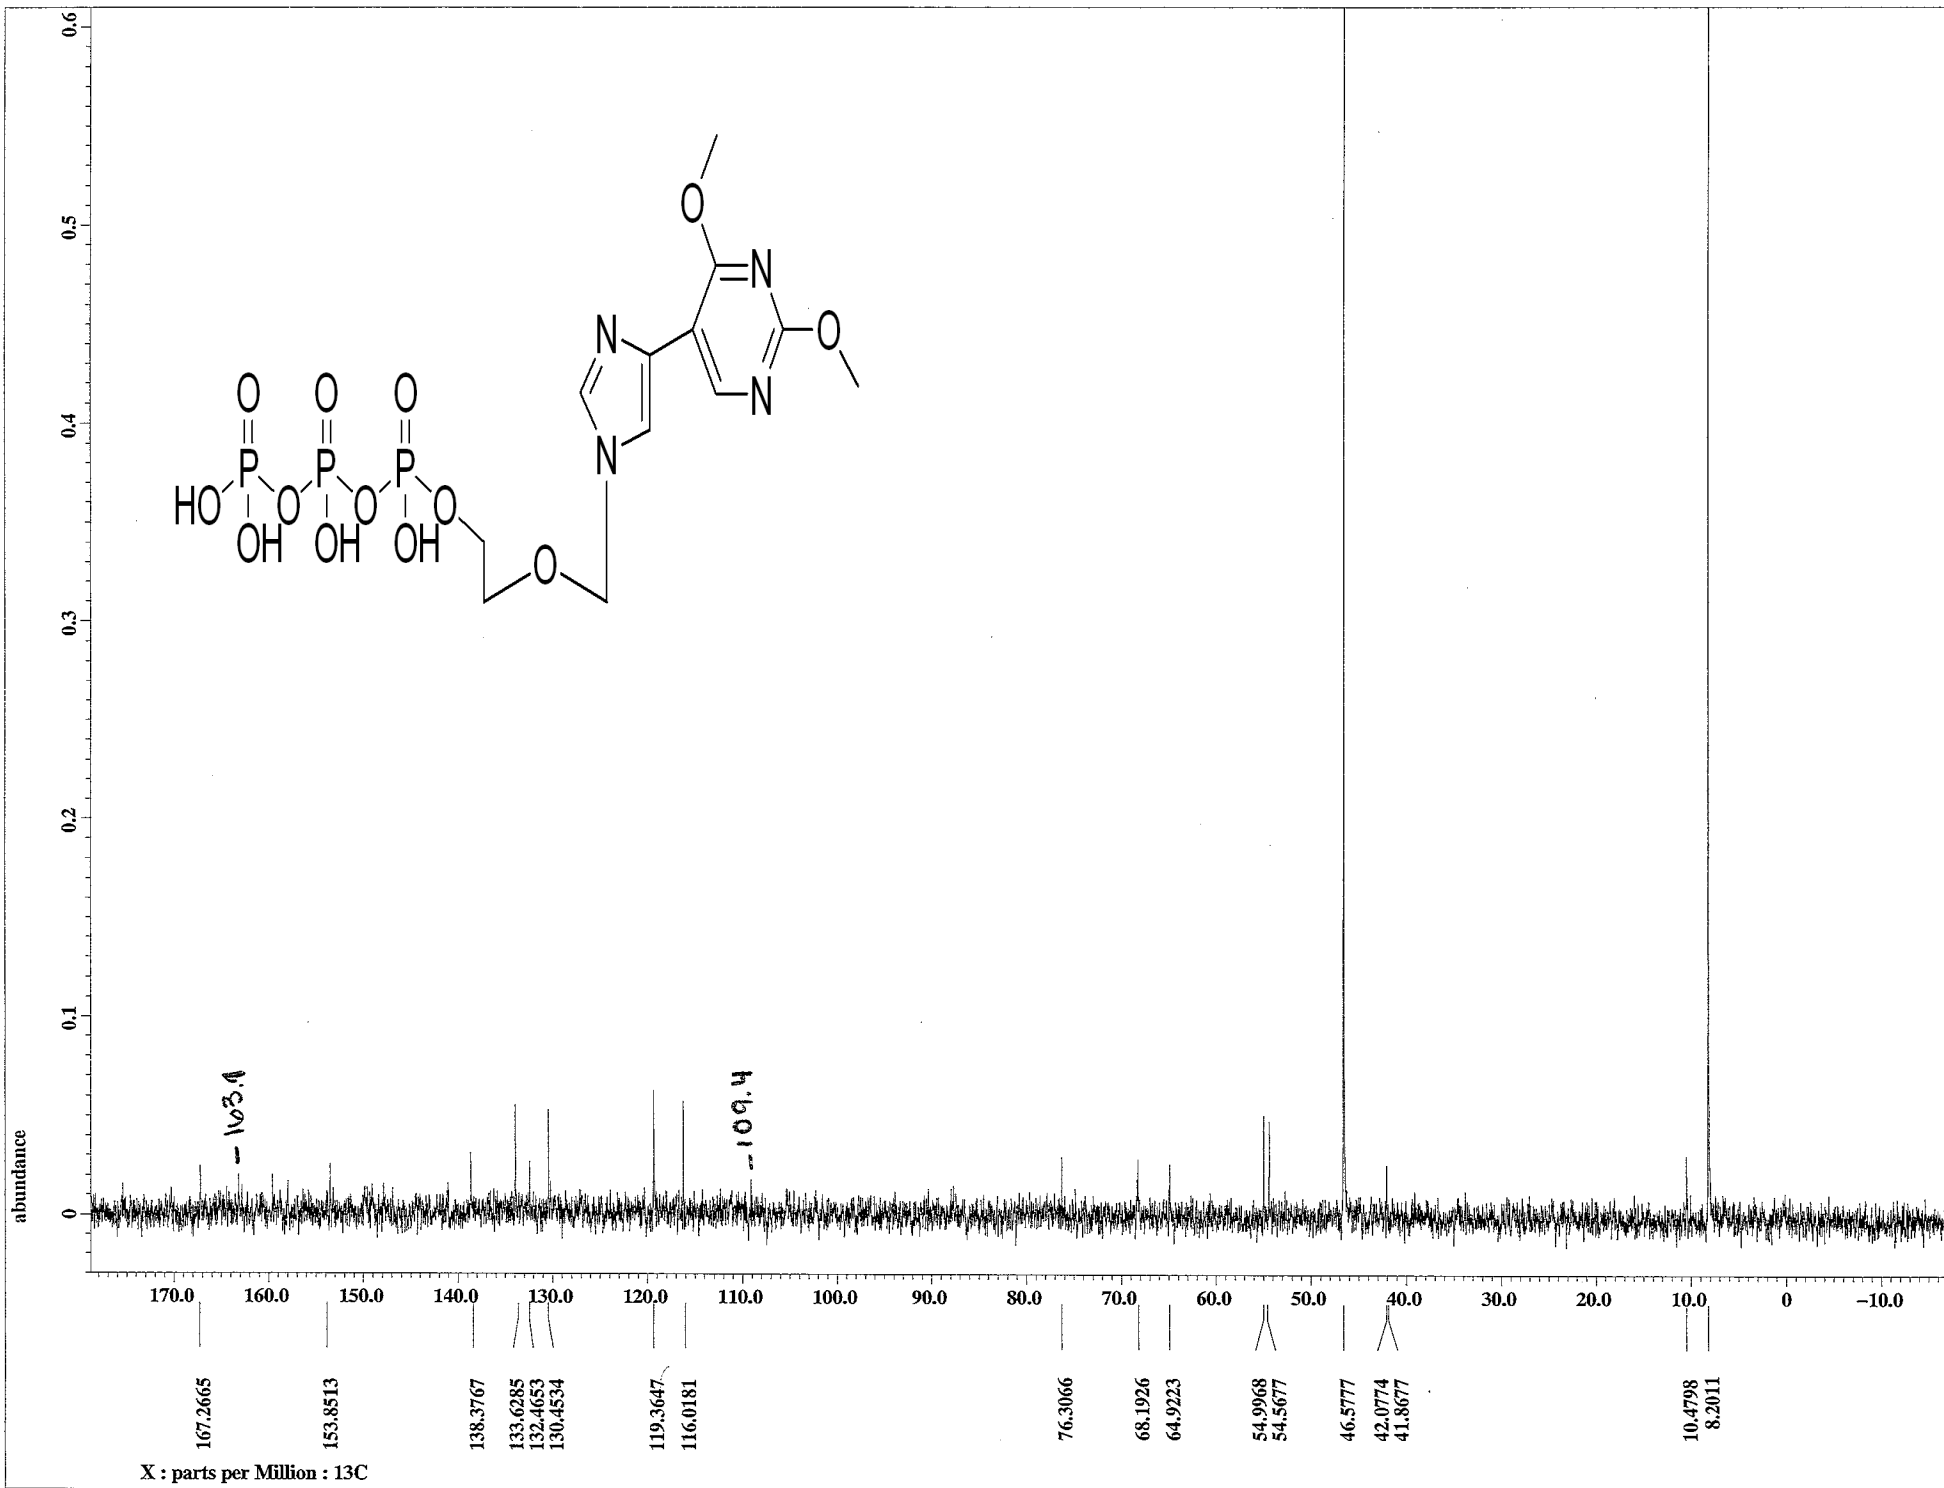

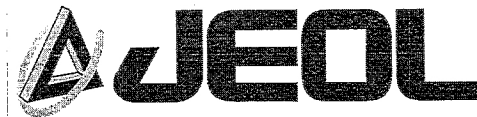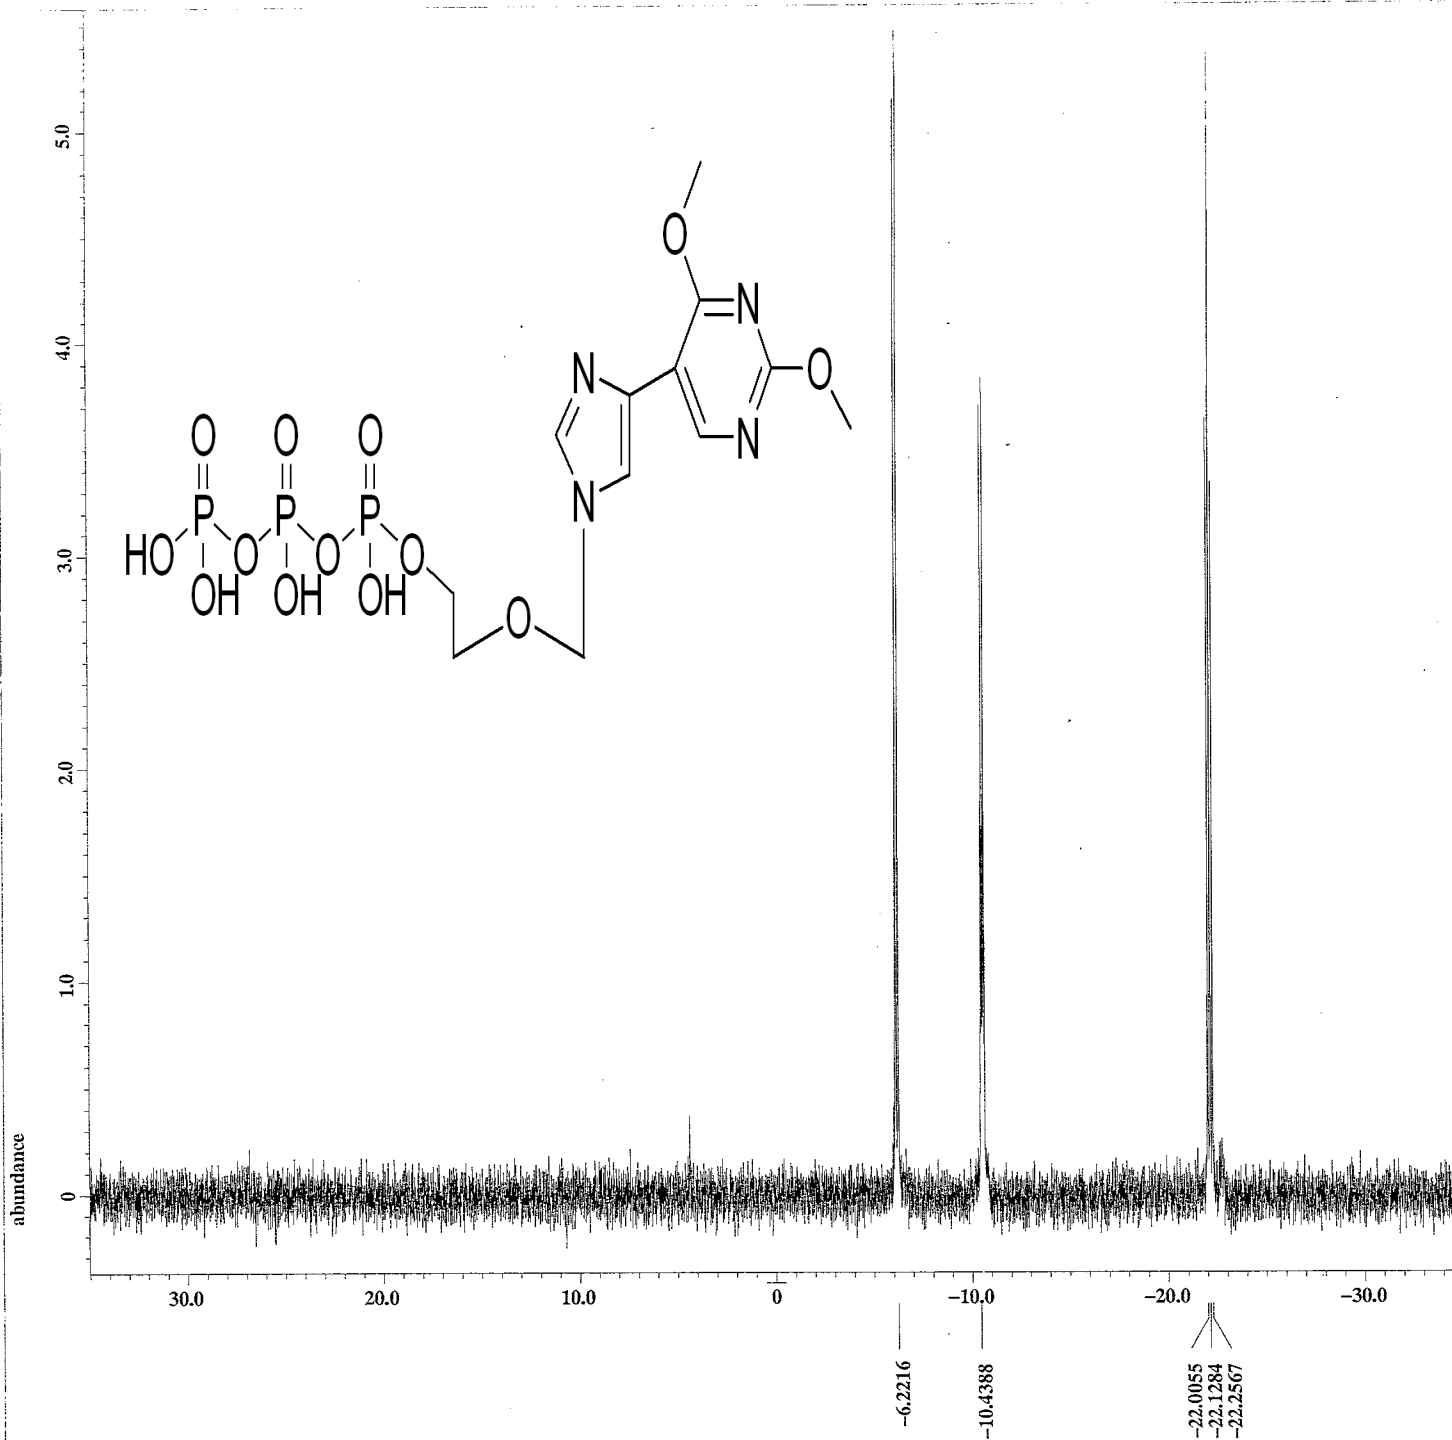

Filename = MY-3-034.PHOS-3.jdf  
Author = Seley  
Experiment = single\_pulse.ex2  
Sample\_id = S#588947  
Solvent = D2O  
Creation\_time = 18-JUL-2017 16:24:04  
Revision\_time = 18-JUL-2017 16:27:15  
Current\_time = 18-JUL-2017 16:27:24

Comment = single\_pulse  
Data\_format = 1D\_COMPLEX  
Dim\_size = 13107  
Dim\_title = 31P  
Dim\_units = [ppm]  
Dimensions = X  
Site = ECX 400  
Spectrometer = DELTA2\_NMR

Field\_strength = 9.389766[T] (400[MHz])  
X\_acq\_duration = 1.15605504[s]  
X\_domain = 31P  
X\_freq = 161.83469309[MHz]  
X\_offset = 0[ppm]  
X\_points = 16384  
X\_prescans = 1  
X\_resolution = 0.86501072[Hz]  
X\_sweep = 14.1723356[kHz]  
Irr\_domain = 31P  
Irr\_freq = 161.83469309[MHz]  
Irr\_offset = 5[ppm]  
Tri\_domain = 31P  
Tri\_freq = 161.83469309[MHz]  
Tri\_offset = 5[ppm]  
Clipped = FALSE  
Mod\_return = 1  
Scans = 32  
Total\_scans = 32

X\_90\_width = 16.2[us]  
X\_acq\_time = 1.15605504[s]  
X\_angle = 45[deg]  
X\_atn = 3[dB]  
X\_pulse = 8.1[us]  
Irr\_mode = Off  
Tri\_mode = Off  
Dante\_presat = FALSE  
Initial\_wait = 1[s]  
Recvr\_gain = 66  
Relaxation\_delay = 5[s]  
Repetition\_time = 6.15605504[s]  
Temp\_get = 22.5[degC]

# Generic Display Report

## Analysis Info

Analysis Name D:\Data\Seley\Joy\JET-2-boronic ester suzuki00.d  
Method Seley\_ESI\_Pos\_Generic.m  
Sample Name .ACh  
Comment

Acquisition Date 5/19/2020 2:24:56 PM

Operator ADM  
Instrument amaZon speed

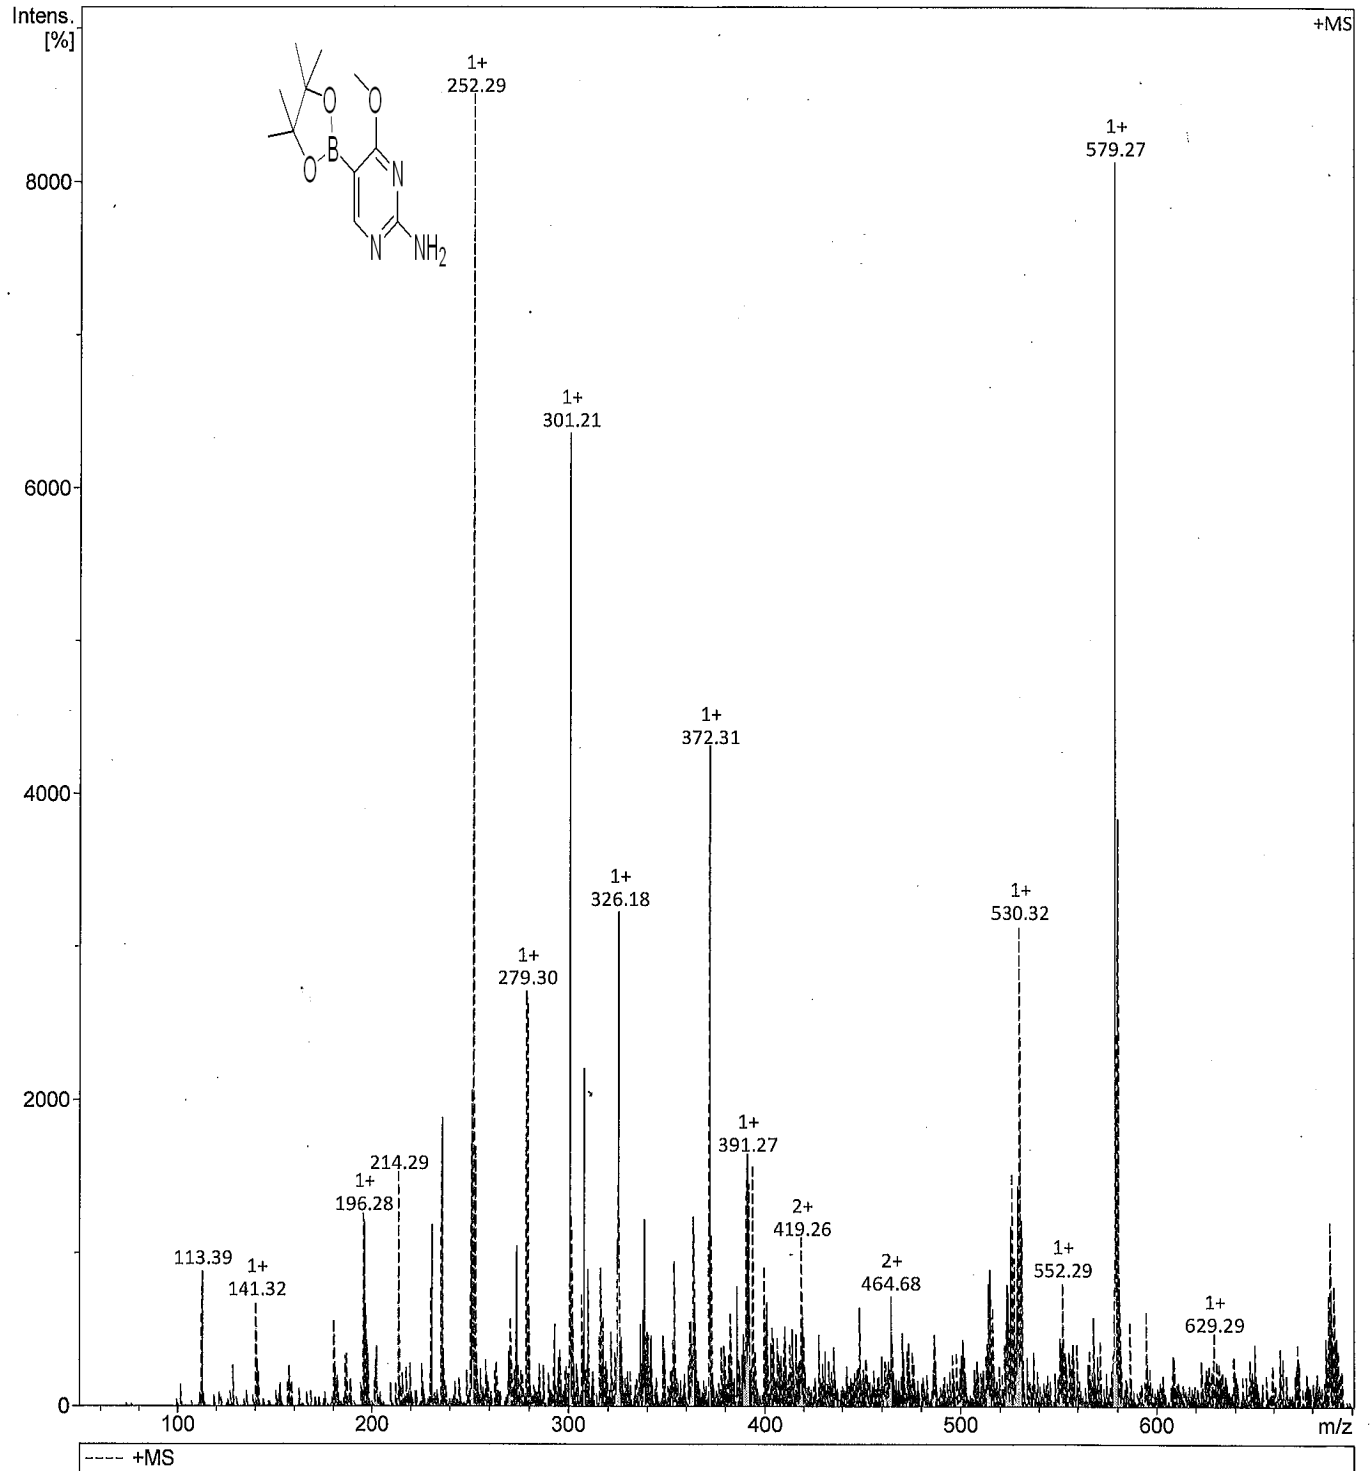

Supplement: mmc1.pdf [file mmc1.pdf]
